# Supplementary material for: Genome mining and molecular characterization of the biosynthetic gene cluster of a diterpenic meroterpenoid, 15-deoxyoxalicine B, in Penicillium canescens
Source: PubMed Central journal article supplement (PMC6054112; doi:10.1039/c5sc01965f), 2015-08-06
Supplement: SC-006-C5SC01965F-s001.pdf [file SC-006-C5SC01965F-s001.pdf]

## Supporting Information

### Genome Mining and Molecular Characterization of the Biosynthetic Gene Cluster of a Diterpenic Meroterpenoid, 15-Deoxyoxalicine B, in *Penicillium canescens*

Junko Yaegashi, Jillian Romsdahl, Yi-Ming Chiang, Clay C.C. Wang

Correspondence should be addressed to C. C. C. W ([clayw@usc.edu](mailto:clayw@usc.edu))

### Table of Contents

|                                                                                         |                |
|-----------------------------------------------------------------------------------------|----------------|
| <b>Supplemental Methods</b>                                                             | <b>S2</b>      |
| <b>Spectral Data of compounds</b>                                                       | <b>S2</b>      |
| <b>Table S1.</b> Primers used in this study                                             | <b>S5</b>      |
| <b>Table S2.</b> <i>P. canescens</i> strains used in this study                         | <b>S8</b>      |
| <b>Table S3.</b> <sup>1</sup> H-NMR data for compounds <b>1</b> , <b>2</b> and <b>3</b> | <b>S9</b>      |
| <b>Table S4.</b> <sup>1</sup> H-NMR data for compounds <b>4</b> , <b>5</b> and <b>6</b> | <b>S10</b>     |
| <b>Table S5.</b> <sup>1</sup> H-NMR data for compounds <b>7</b> and <b>8</b>            | <b>S11</b>     |
| <b>Table S6.</b> <sup>13</sup> C-NMR data for compounds <b>7</b> and <b>8</b>           | <b>S12</b>     |
| <b>Figure S1.</b> Key gHMBC correlations of compounds <b>7</b> and <b>8</b>             | <b>S13</b>     |
| <b>Figure S2.</b> Selective 1D NOESY correlations of compound <b>8</b>                  | <b>S13</b>     |
| <b>Figure S3.</b> UV-Vis and ESIMS spectra of compounds <b>1</b> to <b>8</b>            | <b>S14</b>     |
| <b>Figure S4.</b> Results of diagnostic PCR for all the gene deletion strains           | <b>S16</b>     |
| <b>Figure S5.</b> Result of RT-PCR analysis for <i>olcC</i>                             | <b>S17</b>     |
| <b>Figure S6-S20.</b> NMR spectra of compounds <b>7</b> and <b>8</b>                    | <b>S18-S32</b> |

## Supplemental Methods

### Isolation and identification of secondary metabolites

All strains were cultivated at 26°C for 6 days on ~200 CZA plates at  $10 \times 10^6$  spores per 10 cm plate. Similar to the method described above, the agar was chopped and sonicated in MeOH, followed by 1:1 CH<sub>2</sub>Cl<sub>2</sub>/MeOH. The organic material was evaporated and extracted twice with an equal volume of EtOAc. All EtOAc layers were combined and evaporated *in vacuo*.

For isolation of 15-deoxyoxalicine B and its biosynthetic intermediates, the crude extract in the EtOAc layer (~150 mg) was coated on 2.3 g C<sub>18</sub> silica gel (Cosomil 75C<sub>18</sub>-OPN, Nacalai Tesque), which was then suspended in MeOH and applied to a silica gel column (32 x 50 mm). After equilibrating the column to the starting solvent system of 1:9 MeOH-H<sub>2</sub>O, the extract was eluted with MeOH-H<sub>2</sub>O mixtures of decreasing polarity (fraction A, 1:9, 150 mL; fraction B, 1:1, 150 mL; fraction C, 3:1, 150 mL; fraction D, 1:0, 150 mL). All fractions were analyzed by HPLC-DAD-MS. Fraction C was subjected to semi-preparative reverse phase HPLC (Phenomenex Luna 5 μm C<sub>18</sub> (2), 250 x 10 mm) with a flow rate of 5.0 ml/min and monitored by a UV detector at 235 nm. The gradient system was MeCN (solvent B) in 5% MeCN/H<sub>2</sub>O (solvent A): 30 to 100% solvent B from 0 to 35 min, maintained at 100% from 35 to 38 min, 100 to 30% solvent B from 38 to 39 min, and re-equilibration with 30% solvent B from 39 to 43 min. Compounds **1** (1.8 mg), **2** (0.9 mg), **3** (1.2 mg), **4** (0.9 mg), **5** (0.8 mg), **6** (1.0 mg), **7** (1.8 mg), and **8** (0.8 mg) eluted at 9 min, 19 min, 8 min, 15 min, 22 min, 22 min, 20 min, and 14 min, respectively.

### RT-PCR analysis of the expression of *olcC*

The *P. canescens* wild type and the *olcC* deletant strain were cultivated on LCMM agar at 26 °C for 6 days for mRNA extraction. The β-tubulin gene (protein ID 352267) was used as a control and quantification standard. Total mRNA was extracted by using the Qiagen RNeasy Plant Mini Kit. The total mRNA was digested by Recombinant DNase I (Ambion) to remove DNA contamination. The cDNA library was made from the same amount of total mRNA by using TaqMan reverse transcription reagents (Applied Biosystems) and the oligo dT primer. The cDNA was then used as the template for PCR amplification with specific primer sets listed in Table S1. Amplification products were analyzed by electrophoresis in 1% agarose gels stained with ethidium bromide.

### Spectral data of Compounds

For compound structure elucidation, <sup>1</sup>H and <sup>13</sup>C spectra were collected on nuclear magnetic resonance (NMR) Varian VNMRS-600 and Varian Mercury Plus 400 spectrometers. High-resolution electrospray ionization mass spectrum (HRESI-MS) was obtained with an Agilent Technologies 6210 time of flight mass spectrometer. Optical rotations were measured with a JascoP-2000 polarimeter operating on the sodium D-line (589 nm), using a 100 mm path-length and are reported as  $[\alpha]_D^T$  (concentration in g/100 mL, solvent).

**15-deoxyoxalicine B (1)**

White amorphous powder;  $[\alpha]_D^{25}$ : + 47.3 (*c* 0.15, CH<sub>2</sub>Cl<sub>2</sub>).

UV/Vis  $\lambda_{\max}$  (MeOH)<sub>max</sub>: 238, 269, 331 nm.

<sup>1</sup>H NMR: Table S3.

HRESI-MS, [M + H]<sup>+</sup> *m/z* found 504.2374 calc. for C<sub>30</sub>H<sub>33</sub>NO<sub>6</sub>: 504.2381.

**15-deoxyoxalicine A (2)**

White amorphous powder.

UV/Vis  $\lambda_{\max}$  (MeOH)<sub>max</sub>: 238, 269, 331 nm.

<sup>1</sup>H NMR: Table S3.

HRESI-MS, [M + H]<sup>+</sup> *m/z* found 488.2434 calc. for C<sub>30</sub>H<sub>33</sub>NO<sub>5</sub>: 488.2431.

**Decaturin A (3)**

White amorphous powder;  $[\alpha]_D^{25}$ : + 73.0 (*c* 0.10, CH<sub>2</sub>Cl<sub>2</sub>).

UV/Vis  $\lambda_{\max}$  (MeOH)<sub>max</sub>: 238, 269, 333 nm.

<sup>1</sup>H NMR: Table S3.

HRESI-MS, [M + H]<sup>+</sup> *m/z* found 506.2546 calc. for C<sub>30</sub>H<sub>35</sub>NO<sub>6</sub>: 506.2537.

**Decaturin C (4)**

White amorphous powder;  $[\alpha]_D^{25}$ : + 86.7 (*c* 0.08, CH<sub>2</sub>Cl<sub>2</sub>).

UV/Vis  $\lambda_{\max}$  (MeOH)<sub>max</sub>: 238, 264, 331 nm.

<sup>1</sup>H NMR: Table S4.

HRESI-MS, [M + H]<sup>+</sup> *m/z* found 490.2591 calc. for C<sub>30</sub>H<sub>35</sub>NO<sub>5</sub>: 490.2588.

**Decaturin D (5)**

White amorphous powder;  $[\alpha]_D^{25}$ : + 85.1 (*c* 0.07, CH<sub>2</sub>Cl<sub>2</sub>).

UV/Vis  $\lambda_{\max}$  (MeOH)<sub>max</sub>: 236, 264, 331 nm.

<sup>1</sup>H NMR: Table S4.

HRESI-MS, [M + H]<sup>+</sup> *m/z* found 474.2617 calc. for C<sub>30</sub>H<sub>35</sub>NO<sub>4</sub>: 474.2639.

**Decaturin F (6)**

White amorphous powder;  $[\alpha]_D^{25}$ : + 92.8 (*c* 0.08, MeOH).

UV/Vis  $\lambda_{\max}$  (MeOH)<sub>max</sub>: 238, 269, 331 nm.

<sup>1</sup>H NMR: Table S4.

HRESI-MS, [M + H]<sup>+</sup> *m/z* found 492.2752 calc. for C<sub>30</sub>H<sub>37</sub>NO<sub>5</sub>: 492.2751.

**Predecaturin E (7)**

White amorphous powder;  $[\alpha]_D^{25}$ : - 48.7 (*c* 0.15, MeOH).

UV/Vis  $\lambda_{\max}$  (MeOH)<sub>max</sub>: 235, 331 nm.

<sup>1</sup>H NMR: Table S5 and Figure S6; <sup>13</sup>C NMR: Table S6 and Figure S7.

HRESI-MS, [M + H]<sup>+</sup> *m/z* found 478.2962 calc. for C<sub>30</sub>H<sub>39</sub>NO<sub>4</sub>: 478.2952.

**Decaturin G (8)**

White amorphous powder.

UV/Vis  $\lambda_{\max}$  (MeOH)<sub>max</sub>: 238, 269, 333 nm.

$^1\text{H}$  NMR: Table S5 and Figure S14;  $^{13}\text{C}$  NMR: Table S6 and Figure S15.  
HRESI-MS,  $[\text{M} + \text{H}]^+$   $m/z$  found 490.2568 calc. for  $\text{C}_{30}\text{H}_{35}\text{NO}_5$ : 490.2588.

**Table S1.** Primers used in this study (5' → 3')

|                      |                                                  |
|----------------------|--------------------------------------------------|
| 410805-P1            | TTGGCTGGATCGGTGATT                               |
| 410805-P2            | AGCGGACGATTTTTGCTG                               |
| 410805-P3            | <b>CGAAGAGGGTGAAGAGCATTG</b> CAGCGCATAAACGCATTG  |
| 410805-P4            | <b>CAGTGCCTCCTCTCAGACAG</b> CCTAAACACCACGCAAAGG  |
| 410805-P5            | TGTGGCATCACAGCAAGG                               |
| 410805-P6            | ATCCTGGGCGATTGAGG                                |
| <i>olcA</i> deletion |                                                  |
| 400488-P1            | AACGACCCGCATACTGGA                               |
| 400488-P2            | CTCAGGCCACGAATACGC                               |
| 400488-P3            | <b>CGAAGAGGGTGAAGAGCATTG</b> ACGGAACTGGTGGGGAAAC |
| 400488-P4            | <b>CAGTGCCTCCTCTCAGACAG</b> TCAAGCCACTTCCAAGG    |
| 400488-P5            | CCCAGAGTTGTCCGATGC                               |
| 400488-P6            | GGTTGTCCCATCGTCCAG                               |
| <i>olcB</i> deletion |                                                  |
| 333321-P1            | CGCATGTGGCTGTACTCG                               |
| 333321-P2            | CGTTTATGCGCTGGCTTT                               |
| 333321-P3            | <b>CGAAGAGGGTGAAGAGCATTG</b> TCGGAGCCTGAAGTCGTC  |
| 333321-P4            | <b>CAGTGCCTCCTCTCAGACAG</b> TATGGAACACCCCGCAGT   |
| 333321-P5            | GTCCGACCGAGGAGGAAT                               |
| 333321-P6            | AAGGGTCAGGGCATGGAT                               |
| <i>olcC</i> deletion |                                                  |
| 351326-P1            | GGATGGTTGGGTAGCTCGT                              |
| 351326-P2            | ACATTGTGGGCAAACATGG                              |
| 351326-P3            | <b>CGAAGAGGGTGAAGAGCATTG</b> AACTGCGATCCGCATCAT  |
| 351326-P4            | <b>CAGTGCCTCCTCTCAGACAG</b> CCCATCCTTTGCATGGTC   |
| 351326-P5            | CATTCCGCCAGAGTCAG                                |
| 351326-P6            | GCATGAGTCCCGATACGC                               |
| <i>olcD</i> deletion |                                                  |
| 437321-P1            | TTGGATTCCCGCTGTTTG                               |
| 437321-P2            | TCAGAATTGCTGCGGATG                               |
| 437321-P3            | <b>CGAAGAGGGTGAAGAGCATTG</b> AAGGTGAAGGGCCGACTC  |
| 437321-P4            | <b>CAGTGCCTCCTCTCAGACAG</b> CGAGCTACCCAACCATCC   |
| 437321-P5            | TCGCCACATTTCTGTTCG                               |
| 437321-P6            | GCACAGCAGCAGAAATGC                               |
| <i>olcE</i> deletion |                                                  |
| 351329-P1            | TTCTGCACTGCGATTTGC                               |
| 351329-P2            | CTTGCTGTCGGGTCTGG                                |
| 351329-P3            | <b>CGAAGAGGGTGAAGAGCATTG</b> GTAAAAGCCGGGTGTGG   |
| 351329-P4            | <b>CAGTGCCTCCTCTCAGACAG</b> ACAGTTCGACGTAGCCTTG  |

351329-P5 GGCAAGCATGGTTTGATAGG  
351329-P6 CCGCAAGTAAGTCCATACCC

*olcF* deletion

367480-P1 CGATCTTGCGAGCTTTCC  
367480-P2 CTCGGAAGGCAAGGACTG  
367480-P3 CGAAGAGGGTGAAGAGCATTGCGGCTCGGATCGAAGTAG  
367480-P4 CAGTGCCTCCTCTCAGACAGATCACCGCCCTGTTTGAC  
367480-P5 AGGGCCAGGTTGGATCTC  
367480-P6 ACCAAGCCTCACGTCTCG

*olcG* deletion

393266-P1 CTTTGATCGGAGGCCAAG  
393266-P2 TGCCTCGTGATCGAATTG  
393266-P3 CGAAGAGGGTGAAGAGCATTGGCCCCGAGGTGAAGTATG  
393266-P4 CAGTGCCTCCTCTCAGACAGCCAGCACAGGGAAGAACC  
393266-P5 ACCCAGTCGTTCCACACC  
393266-P6 TGTACGCGCCACTTTGG

*olcH* deletion

410812-P1 CCTCGGCTAACCAGTGGA  
410812-P2 GCCATTTACCCCGATCCT  
410812-P3 CGAAGAGGGTGAAGAGCATTGTTGGCGGAGAATTGGAAA  
410812-P4 CAGTGCCTCCTCTCAGACAGAAATGGGGATGGCTCGAT  
410812-P5 CCAAGGCACCACATCCTT  
410812-P6 CGCGTACTGGGGAGTGAA

*olcI* deletion

437327-P1 ACGCCATTTCTGGACACC  
437327-P2 GGACTGGACCGCATCAA  
437327-P3 CGAAGAGGGTGAAGAGCATTGTGATCCGCTCAGCATGAA  
437327-P4 CAGTGCCTCCTCTCAGACAGTCCGATTTTGGGGGAAAC  
437327-P5 CGCCATTCACACAACGAC  
437327-P6 CTACTGGGCGGTTTCATCG

*olcJ* deletion

333335-P1 TCCATCCTCCCGTCTCTG  
333335-P2 GCCGGGTGCGTAGTTATG  
333335-P3 CGAAGAGGGTGAAGAGCATTGGGGCGCATCAATCATTTTC  
333335-P4 CAGTGCCTCCTCTCAGACAGTTGTTTCCCCCAAATCG  
333335-P5 AGCGATGCCAGAAGTTGC  
333335-P6 AGTCCACCCTCCCTGTCC

*olcK* deletion

367485-P1 GTACGCCACAGCCATCG  
367485-P2 GGCCACTATGGGGTGTAGG

367485-P3 CGAAGAGGGTGAAGAGCATTGTGGAGAAGCACGGAAAGG  
367485-P4 CAGTGCCTCCTCTCAGACAGAACCTTGGTCACCCATCG  
367485-P5 CCAACGTCTCCCAACGAG  
367485-P6 TAGGGAGCTGGGTGTTGC

*olcL* deletion

351342-P1 AAGCTGTTCCGTGCCAAC  
351342-P2 TTGATTCCGGCGAAAAAG  
351342-P3 CGAAGAGGGTGAAGAGCATTGGGACGGATTGTCCTGTTCG  
351342-P4 CAGTGCCTCCTCTCAGACAGCAATTGGCCGGATACAGG  
351342-P5 TGGCCCGAGTTATCTAGTCG  
351342-P6 GCCCACATCCCCTTACC

367486-P1 AAGTGCCTCGCATCCTGC  
367486-P2 TAAGGGGATGTGGGCGGA  
367486-P3 CGAAGAGGGTGAAGAGCATTGGGGTCCGCTCAGGGTAGA  
367486-P4 CAGTGCCTCCTCTCAGACAGCAGATGTTCGCCCCGGGTT  
367486-P5 CGAACCGTGCAGGTGGAA  
367486-P6 GCCTCACACACGTGCTCA

*olcC* RT-PCR

351326-Fw GGTCAGGGCATGGATCTCTA  
351326-Rev CCTCGGACTTCTGTTTCAGG

$\beta$ -tubulin RT-PCR

352267-Fw ATGGGCACACTCCTGATCTC  
352267-Rev CGACCATGAAGAAGTGCAGA

Blue and red sequences are tails that anneal to the *P. canescens* pyrG fragment (PcanpyrG) during fusion PCR.

**Table S2.** *Penicillium canescens* strains used in this study.

| Label               | Genotype                                           |
|---------------------|----------------------------------------------------|
| Control             | <i>ku70::hph</i>                                   |
| <i>ku70Δ, pyrGΔ</i> | <i>ku70::hph; pyrG-</i>                            |
| 410805Δ             | <i>ku70::hph; pyrG-, ProteinID410805::PcanpyrG</i> |
| <i>olcAΔ</i>        | <i>ku70::hph; pyrG-, ProteinID400488::PcanpyrG</i> |
| <i>olcBΔ</i>        | <i>ku70::hph; pyrG-, ProteinID333321::PcanpyrG</i> |
| <i>olcCΔ</i>        | <i>ku70::hph; pyrG-, ProteinID351326::PcanpyrG</i> |
| <i>olcDΔ</i>        | <i>ku70::hph; pyrG-, ProteinID437321::PcanpyrG</i> |
| <i>olcEΔ</i>        | <i>ku70::hph; pyrG-, ProteinID351329::PcanpyrG</i> |
| <i>olcFΔ</i>        | <i>ku70::hph; pyrG-, ProteinID367480::PcanpyrG</i> |
| <i>olcGΔ</i>        | <i>ku70::hph; pyrG-, ProteinID393266::PcanpyrG</i> |
| <i>olcHΔ</i>        | <i>ku70::hph; pyrG-, ProteinID410812::PcanpyrG</i> |
| <i>olcIΔ</i>        | <i>ku70::hph; pyrG-, ProteinID437327::PcanpyrG</i> |
| <i>olcJΔ</i>        | <i>ku70::hph; pyrG-, ProteinID333335::PcanpyrG</i> |
| <i>olcKΔ</i>        | <i>ku70::hph; pyrG-, ProteinID367485::PcanpyrG</i> |
| <i>olcLΔ</i>        | <i>ku70::hph; pyrG-, ProteinID351342::PcanpyrG</i> |
| 367486Δ             | <i>ku70::hph; pyrG-, ProteinID367486::PcanpyrG</i> |



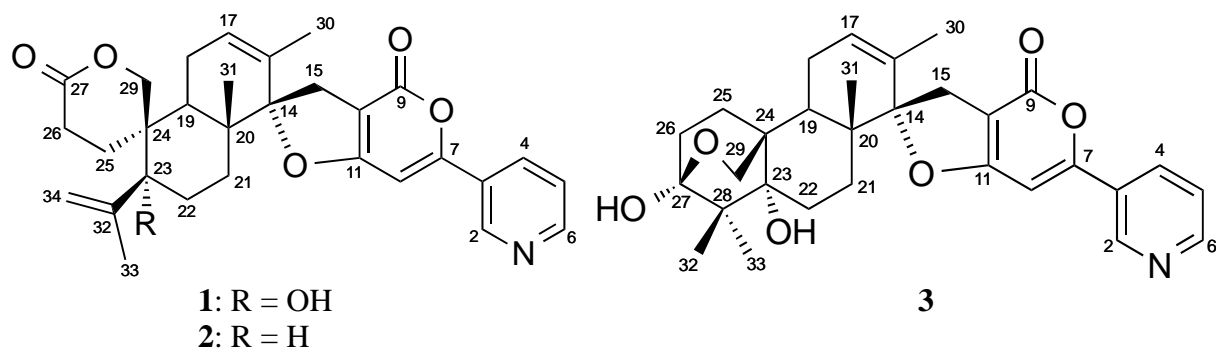

**Table S3.**  $^1\text{H-NMR}$  data for compounds **1**, **2**, and **3** (600 MHz in  $\text{CDCl}_3$ )<sup>a</sup>

| position  | <b>1</b>                                          | <b>2</b>                | <b>3</b>                                          |
|-----------|---------------------------------------------------|-------------------------|---------------------------------------------------|
| <b>2</b>  | 8.99 (1H, d, 1.8)                                 | 9.00 (1H, d, 1.8)       | 9.00 (1H, d, 1.8)                                 |
| <b>4</b>  | 8.11 (1H, dt, 8.4, 1.8)                           | 8.12 (1H, dt, 8.4, 1.8) | 8.10 (1H, dt, 8.4, 1.8)                           |
| <b>5</b>  | 7.39 (1H, dd, 8.4, 4.8)                           | 7.40 (1H, dd, 8.4, 4.8) | 7.39 (1H, dd, 8.4, 4.8)                           |
| <b>6</b>  | 8.66 (1H, dd, 4.8, 1.8)                           | 8.67 (1H, dd, 4.8, 1.8) | 8.67 (1H, dd, 4.8, 1.8)                           |
| <b>12</b> | 6.64 (1H, s)                                      | 6.62 (1H, s)            | 6.61 (1H, s)                                      |
| <b>15</b> | 2.97 (1H, d, 16.8)                                | 2.96 (1H, d, 16.2)      | 2.94 (1H, d, 16.2)                                |
|           | 3.10 (1H, d, 16.8)                                | 3.09 (1H, d, 16.2)      | 3.08 (1H, d, 16.2)                                |
| <b>17</b> | 5.72 (1H, br s)                                   | 5.72 (1H, br s)         | 5.69 (1H, br d, 5.4)                              |
| <b>18</b> | 2.21 (2H, m)                                      | 2.25 (2H, m)            | 1.87 (1H, m)                                      |
|           |                                                   |                         | 2.06 (1H, m)                                      |
| <b>19</b> | 2.67 (1H, dd, 11.4, 6)                            | 1.99 (1H, m)            | 2.24 (1H, dd, 12.6, 4.8)                          |
| <b>21</b> | 1.49 (1H, dt, 14.4, 3.6, $\text{H}_{\text{eq}}$ ) | 1.56 (2H, m)            | 1.29 (1H, dt, 13.8, 3.6, $\text{H}_{\text{eq}}$ ) |
|           | 2.30 (1H, m, $\text{H}_{\text{ax}}$ )             |                         | 1.84 (1H, td; 13.8, 3.6, $\text{H}_{\text{ax}}$ ) |
| <b>22</b> | 1.30 (1H, dt, 13, 3.6, $\text{H}_{\text{eq}}$ )   | 1.56 (1H, m)            | 1.48 (1H, dt, 14.4, 3.6, $\text{H}_{\text{eq}}$ ) |
|           | 2.05 (1H, td, 13, 4.2, $\text{H}_{\text{ax}}$ )   | 1.76 (1H, m)            | 2.10 (1H, td, 14.4, 3.6, $\text{H}_{\text{ax}}$ ) |
| <b>23</b> |                                                   | 2.01 (1H, br s)         |                                                   |
| <b>25</b> | 1.62 (1H, m)                                      | 1.76 (1H, m)            | 1.72 (1H, m, $\text{H}_\beta$ )                   |
|           | 2.49 (1H, m)                                      | 2.25 (1H, m)            | 1.93 (1H, td, 12, 7.2, $\text{H}_\alpha$ )        |
| <b>26</b> | 2.33 (1H, m)                                      | 2.40 (1H, m)            | 1.65 (1H, m)                                      |
|           | 2.43 (1H, m)                                      | 2.44 (1H, m)            | 2.22 (1H, m)                                      |
| <b>29</b> | 4.37 (1H, d, 12.9)                                | 4.37 (1H, d, 12)        | 3.93 (1H, d, 9.6)                                 |
|           | 4.45 (1H, d, 12.9)                                | 4.53 (1H, d, 12)        | 4.12 (1H, dd, 9.6, 2.4)                           |
| <b>30</b> | 1.70 (3H, s)                                      | 1.70 (3H, s)            | 1.67 (3H, s)                                      |
| <b>31</b> | 0.92 (3H, s)                                      | 0.95 (3H, s)            | 0.87 (3H, s)                                      |
| <b>32</b> |                                                   |                         | 1.00 (3H, s)                                      |
| <b>33</b> | 5.07 (1H, s)                                      | 4.76 (1H, s)            | 1.07 (3H, s)                                      |
|           | 5.17 (1H, s)                                      | 4.96 (1H, s)            |                                                   |
| <b>34</b> | 1.89 (3H, s)                                      | 1.80 (3H, s)            |                                                   |

<sup>a</sup> Figures in parentheses are multiplicities, and coupling constants ( $J$ ) in Hz

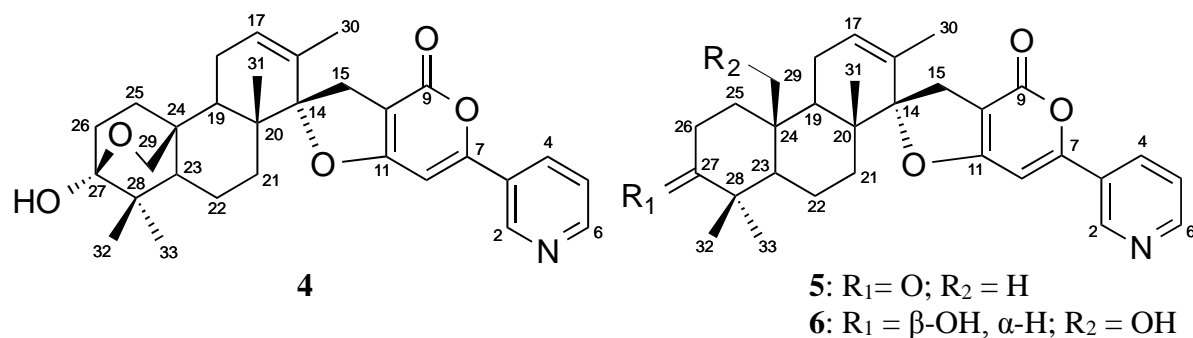

**Table S4.** <sup>1</sup>H-NMR data for compounds **4**, **5** (600 MHz in CDCl<sub>3</sub>), and **6** (600 MHz in DMSO-*d*<sub>6</sub>)<sup>a</sup>

| position | 4                       | 5                        | 6                        |
|----------|-------------------------|--------------------------|--------------------------|
| 2        | 9.00 (1H, d, 1.8)       | 9.01 (1H, d, 1.8)        | 9.07 (1H, d, 1.8)        |
| 4        | 8.12 (1H, dt, 8.4, 1.8) | 8.12 (1H, dt, 8.4, 1.8)  | 8.24 (1H, dt, 8.4, 1.8)  |
| 5        | 7.39 (1H, dd, 8.4, 4.8) | 7.39 (1H, dd, 8.4, 4.8)  | 7.54 (1H, dd, 8.4, 4.8)  |
| 6        | 8.67 (1H, dd, 4.8, 1.8) | 8.66 (1H, dd, 4.8, 1.8)  | 8.67 (1H, 4.8, 1.8)      |
| 12       | 6.60 (1H, s)            | 6.63 (1H, s)             | 7.36 (1H, s)             |
| 15       | 2.92 (1H, d, 16.2)      | 2.95 (1H, d, 16.2)       | 2.88 (1H, d, 16.2)       |
|          | 3.08 (1H, d, 16.2)      | 3.10 (1H, d, 16.2)       | 3.04 (1H, d, 16.2)       |
| 17       | 5.70 (1H, br d, 5.4)    | 5.71 (1H, br s)          | 5.65 (1H, br d, 4.8)     |
| 18       | 1.80 (1H, m)            | 2.07 (2H, m)             | 2.06 (1H, m)             |
|          | 2.14 (1H, m)            |                          | 2.63 (1H, m)             |
| 19       | 1.80 (1H, m)            | 1.77 (1H, dd, 10.2, 6.6) | 1.58 (1H, m)             |
| 21       | 1.35 (1H, m)            | 1.41-1.46 (1H, m)        | 1.35 (1H, dd, 12.6, 4.2) |
|          | 1.53 (1H, m)            | 1.50-1.60 (1H, m)        | 1.59 (1H, m)             |
| 22       | 1.56 (2H, m)            | 1.50-1.60 (1H, m)        | 1.42-1.46 (2H, m)        |
| 23       | 1.29 (1H, m)            | 1.41-1.46 (1H, m)        | 0.78 (1H, dd, 13.8, 2.4) |
| 25       | 1.27 (1H, m)            | 1.50-1.60 (1H, m)        | 0.68 (1H, 13.2, 3.0)     |
|          | 2.16 (1H, m)            | 1.93 (1H, m)             | 2.24 (1H, 13.2, 3.0)     |
| 26       | 1.73 (1H, m)            | 2.42 (1H, m)             | 1.42-1.46 (1H, m)        |
|          | 2.20 (1H, m)            | 2.55 (1H, m)             | 1.56 (1H, m)             |
| 27       |                         |                          | 3.02 (1H, dd, 12, 4.8)   |
| 29       | 3.89 (1H, dd, 9, 1.8)   | 1.071 (3H, s)            | 3.79 (1H, d, 12)         |
|          | 4.20 (1H, dd, 9, 3)     |                          | 3.76 (1H, d, 12)         |
| 30       | 1.66 (3H, br s)         | 1.69 (3H, br d, 1.8)     | 1.61 (3H, s)             |
| 31       | 0.87 (3H, s)            | 0.97 (3H, s)             | 1.02 (3H, s)             |
| 32       | 0.97 (3H, s)            | 1.05 (3H, s)             | 0.71 (3H, s)             |
| 33       | 1.03 (3H, s)            | 1.074 (3H, s)            | 0.89 (3H, s)             |

<sup>a</sup> Figures in parentheses are multiplicities and coupling constants (*J*) in Hz

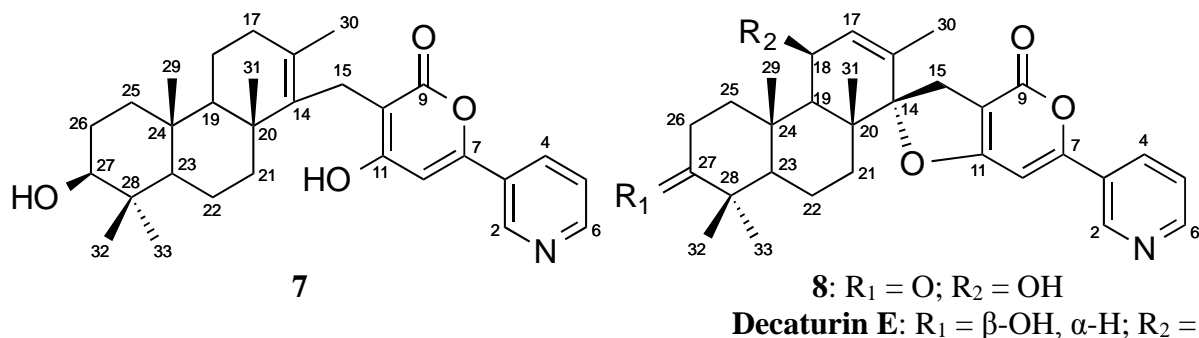

**Table S5.** <sup>1</sup>H-NMR Data for Compounds **7** and **8** (600 MHz in CD<sub>3</sub>OD) compared to previously published data of structurally related Decaturin E (600 MHz in DMSO-*d*<sub>6</sub>)<sup>a, b</sup>

| position  | Decaturin E                              | <b>7</b>                                                                               | <b>8</b>                                 |
|-----------|------------------------------------------|----------------------------------------------------------------------------------------|------------------------------------------|
| <b>2</b>  | 9.07 (1H, d, 1.9)                        | 8.98 (1H, d, 1.8)                                                                      | 9.06 (1H, dd, 1.8, 0.9)                  |
| <b>4</b>  | 8.23 (1H, ddd, 8.2, 1.9, 1.4)            | 8.23 (1H, dt, 8.4, 1.8)                                                                | 8.30 (1H, dt, 8.4, 1.8)                  |
| <b>5</b>  | 7.54 (1H, dd, 8.2, 4.7)                  | 7.54 (1H, dd, 8.4, 4.8)                                                                | 7.57 (1H, dd, 8.4, 4.8)                  |
| <b>6</b>  | 8.67 (1H, dd, 4.7, 1.4)                  | 8.59 (1H, dd, 4.8, 1.8)                                                                | 8.64 (1H, dd, 4.8, 1.8)                  |
| <b>12</b> | 7.36 (1H, s)                             | 6.65 (1H, s)                                                                           | 7.05 (1H, s)                             |
| <b>15</b> | 2.85 (1H, d, 16.1)<br>3.01 (1H, d, 16.1) | 3.25 (1H, d, 16.2)<br>3.24 (1H, d, 16.2)                                               | 3.07 (1H, d, 16.2)<br>3.13 (1H, d, 16.2) |
| <b>17</b> | 5.66 (1H, br s)                          | 2.01-2.12 (2H, m)                                                                      | 5.75 (1H, br d, 4.8)                     |
| <b>18</b> | 1.98 (2H, m)                             | 1.46-1.51 (1H, m)<br>1.50-1.60 (1H, m)                                                 | 4.46 (1H, br t, 4.8)                     |
| <b>19</b> | 1.58 (1H, m)                             | 1.11 (1H, dd, 12.6, 1.8)                                                               | 1.70 (1H, d, 4.8)                        |
| <b>21</b> | 1.28 (1H, m)<br>1.56 (1H, m)             | 1.34 (1H, td, 13.2, 3.6), H <sub>ax</sub><br>2.01-2.12 (1H, m), H <sub>eq</sub>        | 1.51-1.67 (2H, m)                        |
| <b>22</b> | 1.41 (1H, m)<br>1.52 (1H, m)             | 1.43 (1H, td, 13.2, 1.8), H <sub>ax</sub><br>1.50-1.60 (1H, m), H <sub>eq</sub>        | 1.51-1.67 (2H, m)                        |
| <b>23</b> | 0.70 (1H, m)                             | 0.78 (1H, dd, 12.0, 1.8)                                                               | 1.36 (1H, br d, 12)                      |
| <b>25</b> | 0.91 (1H, m)<br>1.60 (1H, m)             | 0.96 (1H, td, 13.2, 3.6), H <sub>ax</sub><br>1.78 (1H, dt, 13.2, 3.6), H <sub>eq</sub> | 1.51-1.67 (1H, m)<br>2.37 (1H, m)        |
| <b>26</b> | 1.48 (2H, m)                             | 1.59-1.63 (1H, m)<br>1.63-1.69 (1H, m)                                                 | 2.37 (1H, m)<br>2.75 (1H, m)             |
| <b>27</b> | 2.98 (1H, m)                             | 3.13 (1H, dd, 12, 4.8)                                                                 |                                          |
| <b>29</b> | 0.89 (3H, s)                             | 0.87 (3H, s)                                                                           | 1.56 (3H, s)                             |
| <b>30</b> | 1.62 (3H, s)                             | 1.66 (3H, s)                                                                           | 1.78 (3H, s)                             |
| <b>31</b> | 0.87 (3H, s)                             | 1.03 (3H, s)                                                                           | 1.30 (3H, s)                             |
| <b>32</b> | 0.68 (3H, s)                             | 0.76 (3H, s)                                                                           | 1.10 (3H, s)                             |
| <b>33</b> | 0.86 (3H, s)                             | 0.93 (3H, s)                                                                           | 1.05 (3H, s)                             |

<sup>a</sup> Figures in parentheses are multiplicities and coupling constants (*J*) in Hz

<sup>b</sup> Ref: Wang, P.-l.; Li, D.-y.; Xie, L.-r.; Wu, X.; Hua, H.-m.; Li, Z.-l. *Nat. Prod. Commun.* **2013**, *8*, 1397-1398.

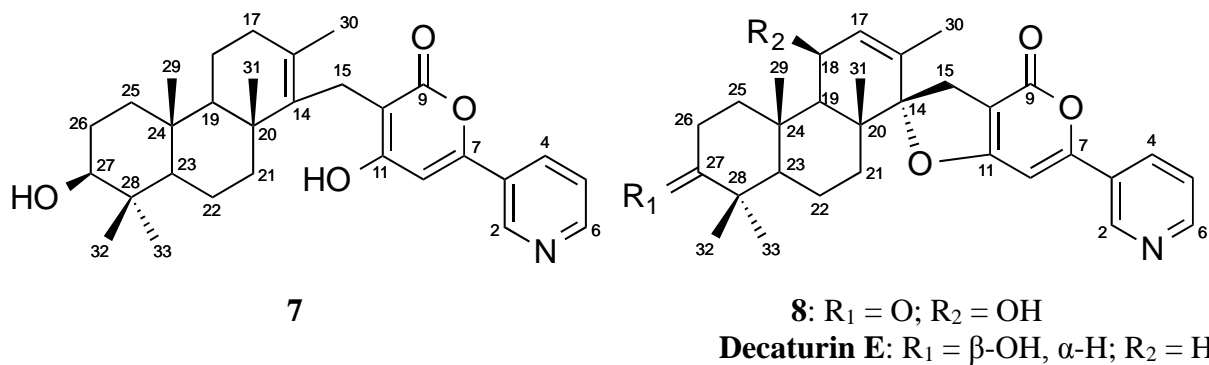

**Table S6.** <sup>13</sup>C-NMR data for compounds **7** and **8** (150 MHz in CD<sub>3</sub>OD) compared to previously published data of structurally related Decaturin E (150 MHz in DMSO-*d*<sub>6</sub>)<sup>a</sup>

| position  | Decaturin E | <b>7</b>          | <b>8</b>          |
|-----------|-------------|-------------------|-------------------|
| <b>2</b>  | 146.7       | 147.1             | 147.8             |
| <b>3</b>  | 127.2       | 129.8             | 129.2             |
| <b>4</b>  | 133.1       | 134.8             | 135.3             |
| <b>5</b>  | 124.0       | 125.6             | 125.6             |
| <b>6</b>  | 151.4       | 151.5             | 152.2             |
| <b>7</b>  | 159.5       | 155.9             | 161.6             |
| <b>9</b>  | 170.0       | 167.2             | 172.8             |
| <b>10</b> | 101.2       | 102.7             | 103.4             |
| <b>11</b> | 159.6       | 179.7             | 163.0             |
| <b>12</b> | 94.2        | 106.0             | 95.8              |
| <b>14</b> | 100.1       | 138.3             | 102.3             |
| <b>15</b> | 27.8        | 24.0              | 29.8              |
| <b>16</b> | 130.9       | 129.2             | 133.5             |
| <b>17</b> | 128.1       | 35.7              | 132.1             |
| <b>18</b> | 22.5        | 19.4              | 65.3              |
| <b>19</b> | 47.4        | 57.9              | 52.0              |
| <b>20</b> | 40.3        | 40.7              | 41.9              |
| <b>21</b> | 31.7        | 39.7 <sup>b</sup> | 33.5              |
| <b>22</b> | 17.5        | 19.8              | 20.6              |
| <b>23</b> | 54.5        | 56.9              | 57.5              |
| <b>24</b> | 36.4        | 38.5              | 39.0              |
| <b>25</b> | 37.9        | 39.9 <sup>b</sup> | 39.6 <sup>c</sup> |
| <b>26</b> | 26.9        | 28.2              | 35.1              |
| <b>27</b> | 76.8        | 79.9              | 218.5             |
| <b>28</b> | 38.4        | 40.1              | 39.5 <sup>c</sup> |
| <b>29</b> | 15.4        | 17.2              | 17.6              |
| <b>30</b> | 18.1        | 21.0              | 19.0              |
| <b>31</b> | 15.9        | 22.0              | 19.7              |
| <b>32</b> | 16.0        | 16.2              | 22.4              |
| <b>33</b> | 28.2        | 28.7              | 26.9              |

<sup>a</sup> Ref: Wang, P.-l.; Li, D.-y.; Xie, L.-r.; Wu, X.; Hua, H.-m.; Li, Z.-l. *Nat. Prod. Commun.* **2013**, *8*, 1397-1398.

<sup>b, c</sup> These assignments may be interchanged.

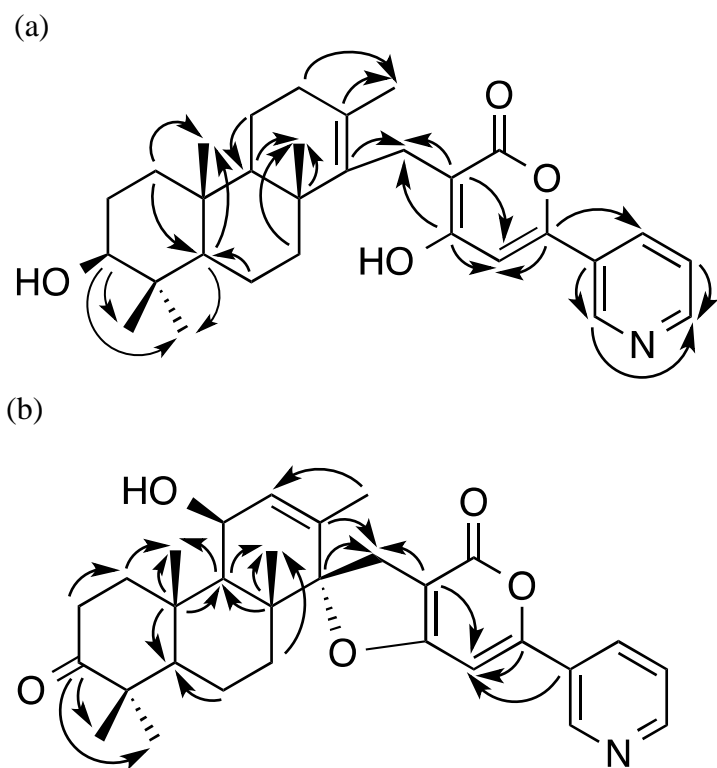

**Figure S1.** Key gHMBC correlations (C→H) of (a) precaturin E (**7**) and (b) decaturin G (**8**).

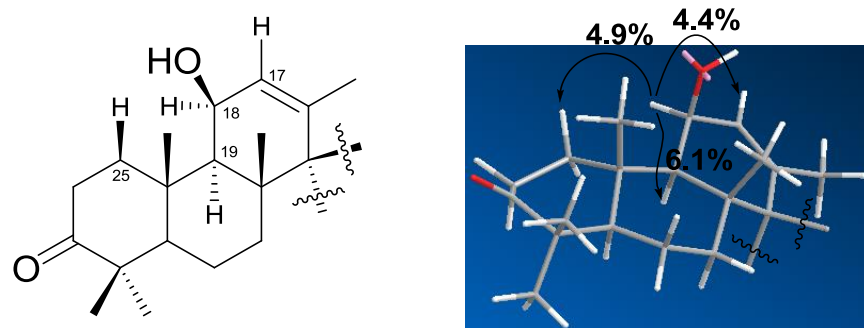

**Figure S2.** Selective 1D NOESY correlations of decaturin G (**8**).

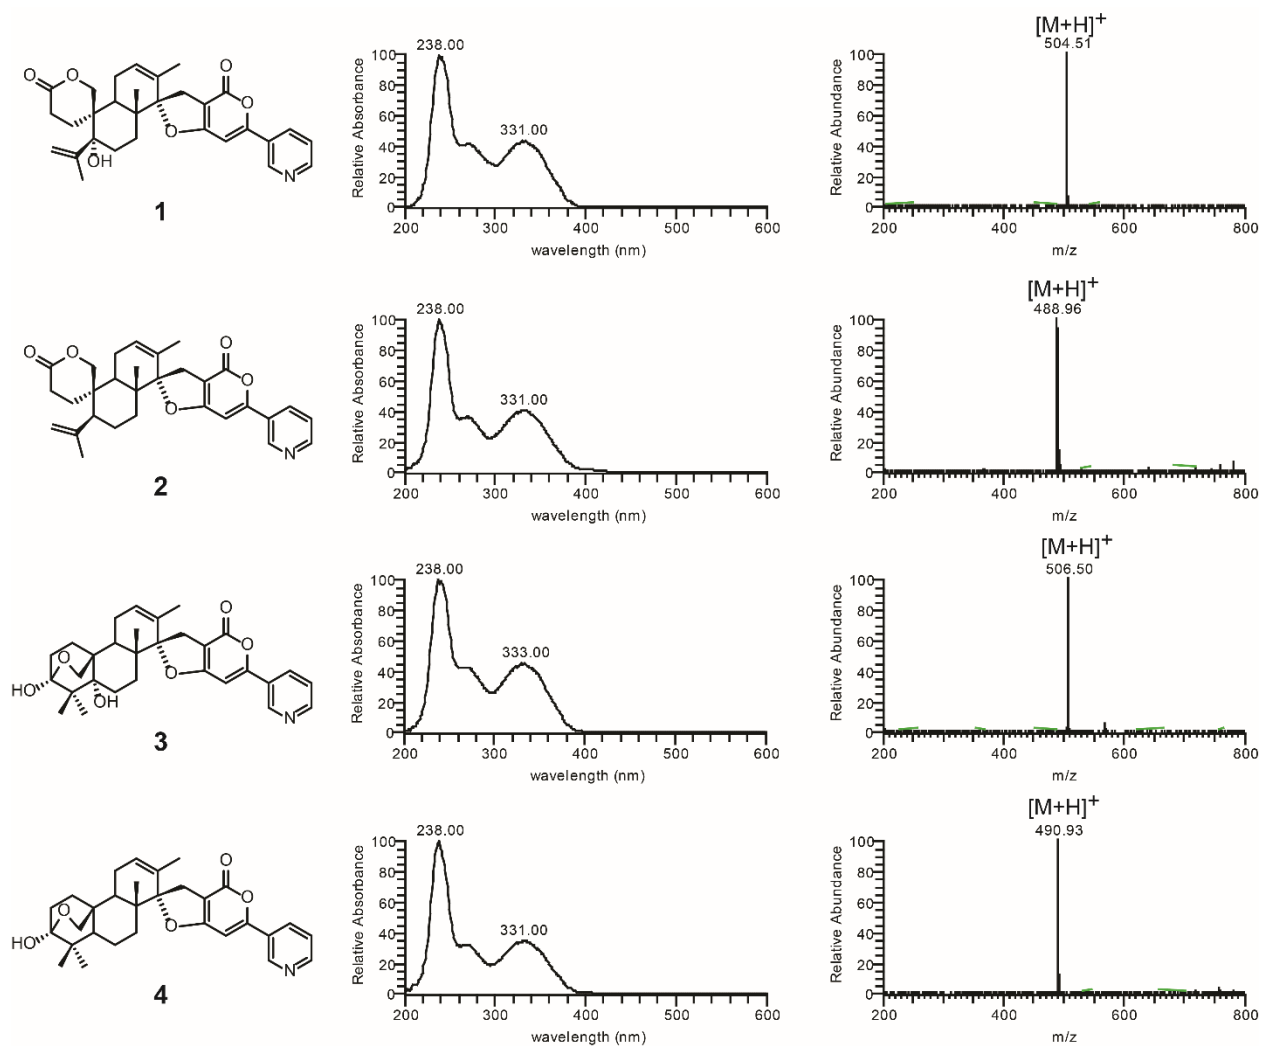

**Figure S3.** UV-Vis and ESI-MS spectra of compounds isolated from this study.

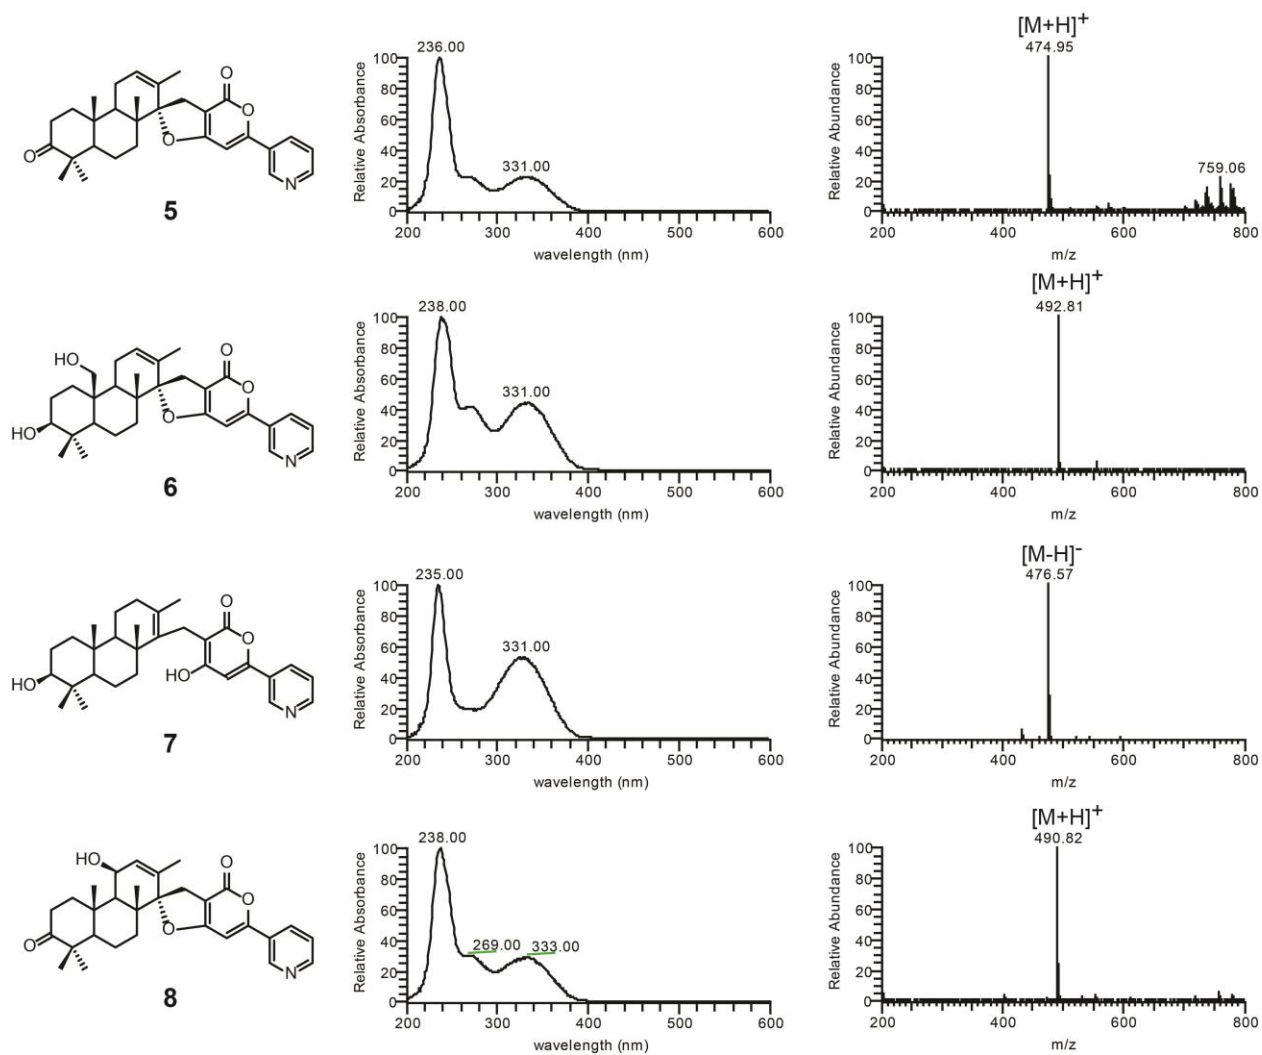

**Figure S3 (continued).** UV-Vis and ESI-MS spectra of compounds isolated from this study.

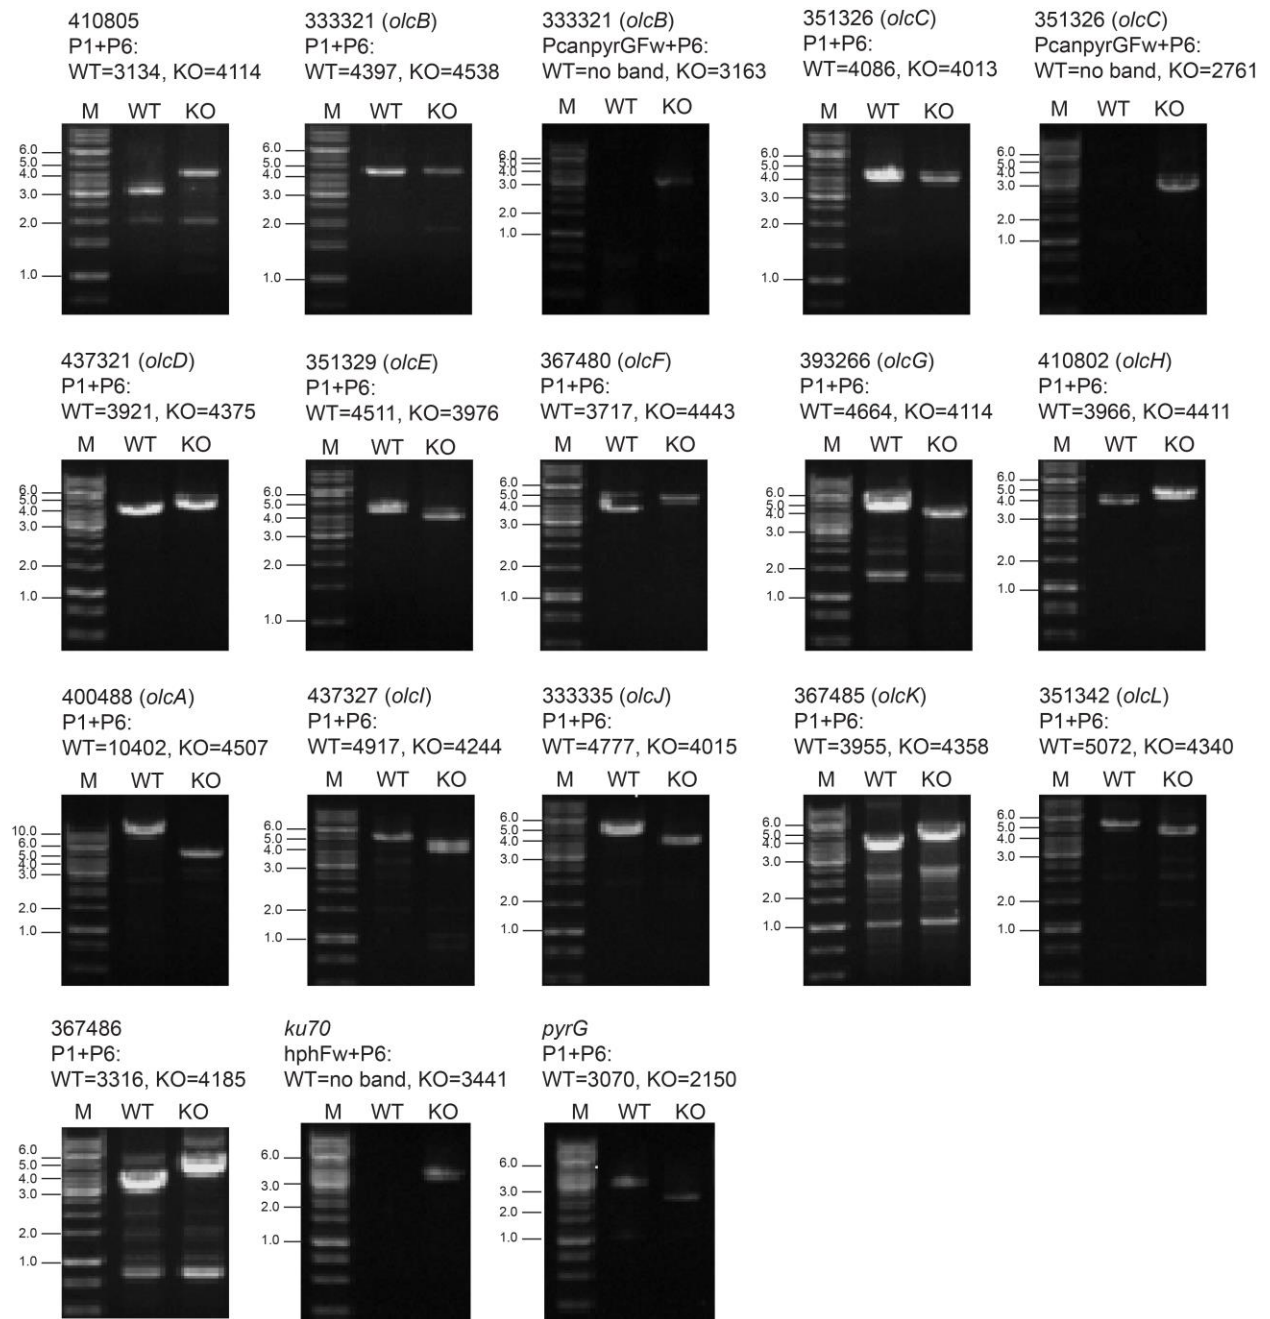

**Figure S4.** Results of diagnostic PCR for deletion strains.



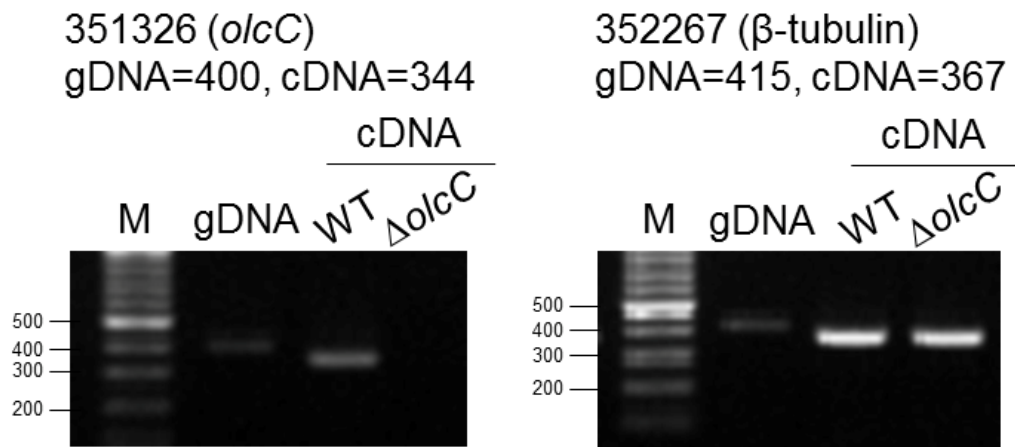

**Figure S5.** Result of RT-PCR analysis for *olcC*.

Compound 7 HNMR  
Temp 25.0 C  
Relax delay 1.00 sec  
Pulse 45.0 degrees  
Acq. time 1.704 sec  
Width 9615.4 Hz  
128 repetitions  
Observe H1, 599. 8015981 MHz

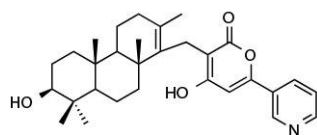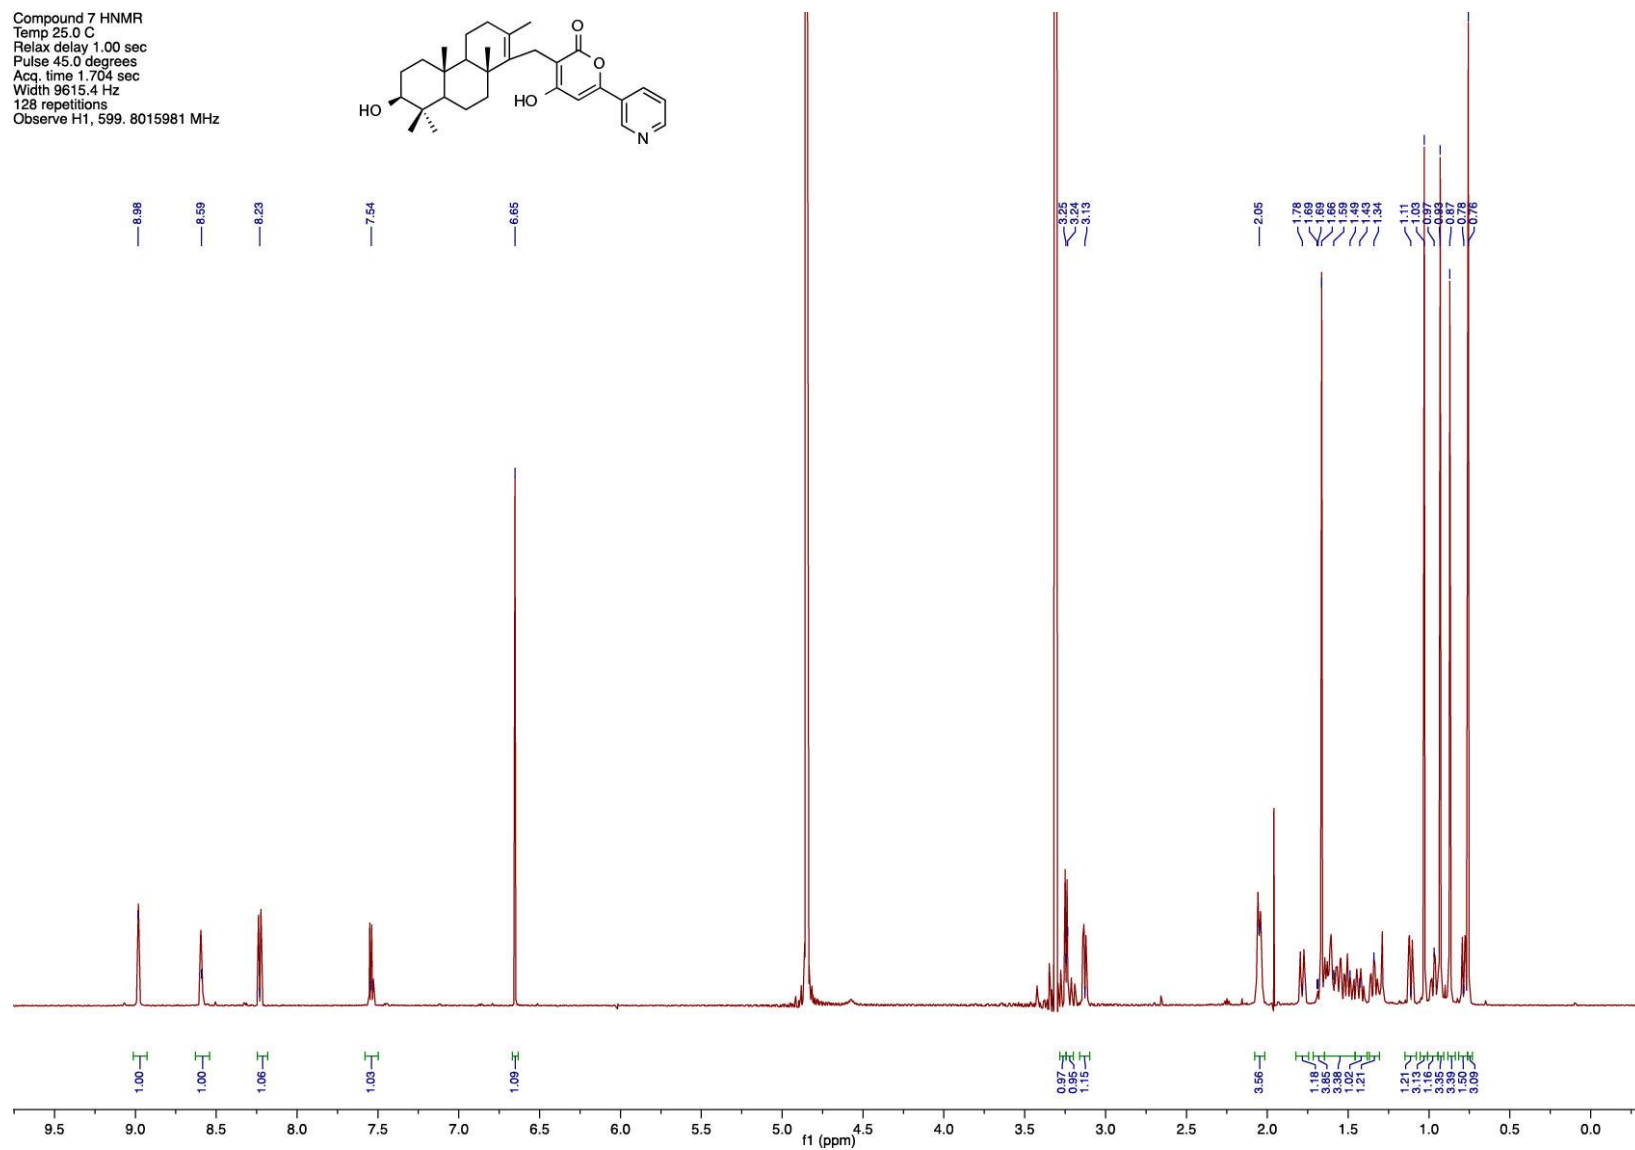

Figure S6. <sup>1</sup>H-NMR spectrum of compound 7 in CD<sub>3</sub>OD

Compound 7 CNMR  
 Temp 25.0 C  
 Relax delay 1.000 sec  
 Pulse 45.0 degree  
 Acq. time 1.304 sec  
 Width 25125.6 Hz  
 30000 repetitions  
 Observe C13, 100.6047600 MHz  
 Decouple H1, 400.1008433 MHz  
 Power 36 dB continuously  
 on WALTZ-16 modulated

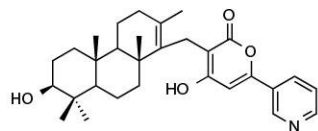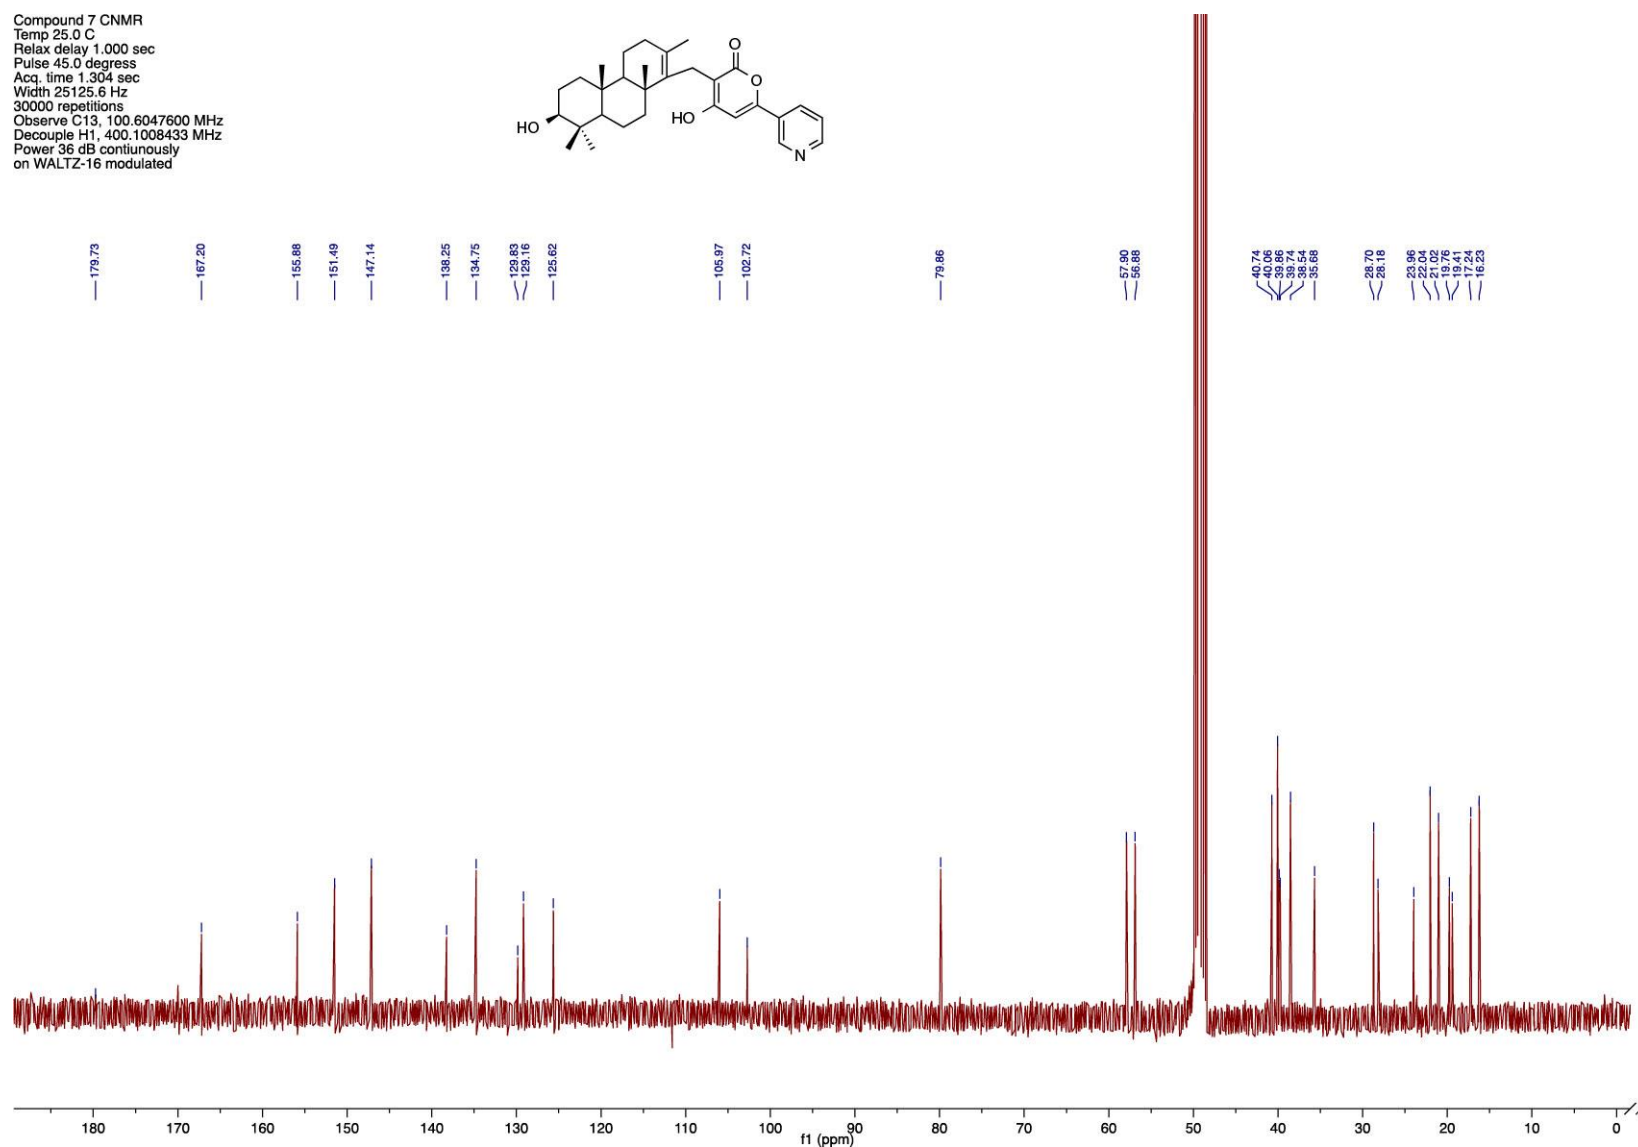

Figure S7. <sup>13</sup>C-NMR spectrum of compound 7 CD<sub>3</sub>OD

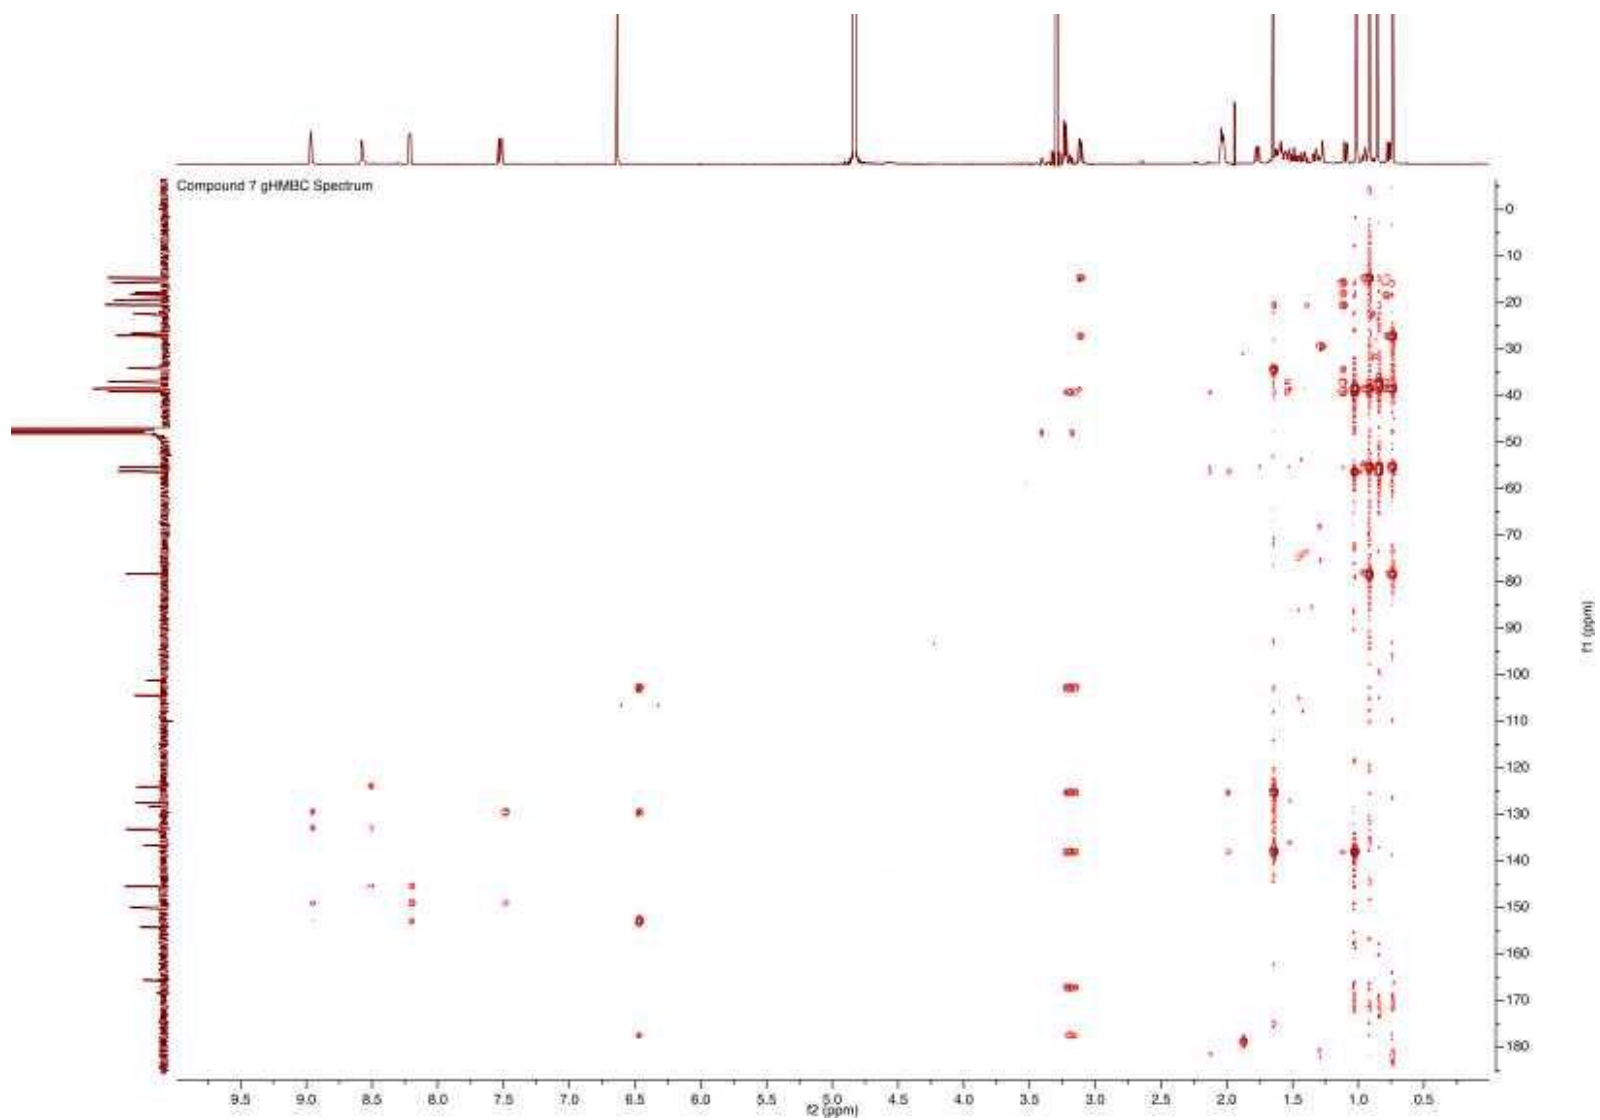

**Figure S8.**  $^1\text{H}$ - $^{13}\text{C}$  gHMBC spectrum of compound 7 in  $\text{CD}_3\text{OD}$

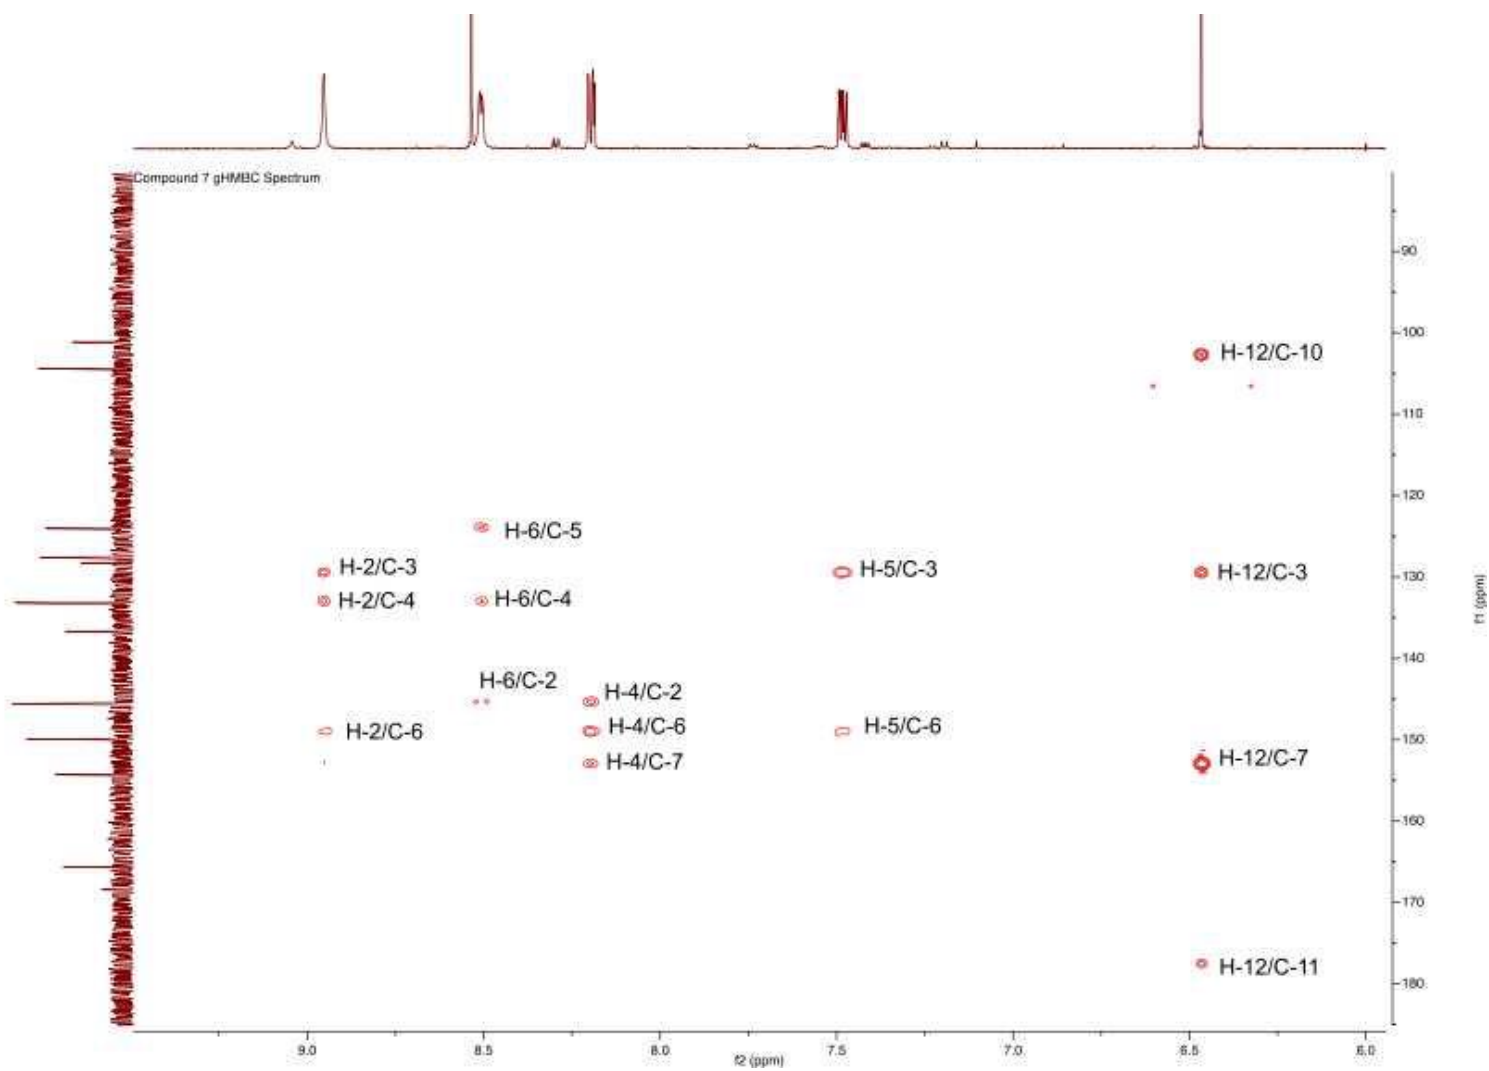

**Figure S9.** <sup>1</sup>H-<sup>13</sup>C gHMBC spectrum of compound 7 in CD<sub>3</sub>OD with labeled signals (Part 1/3)

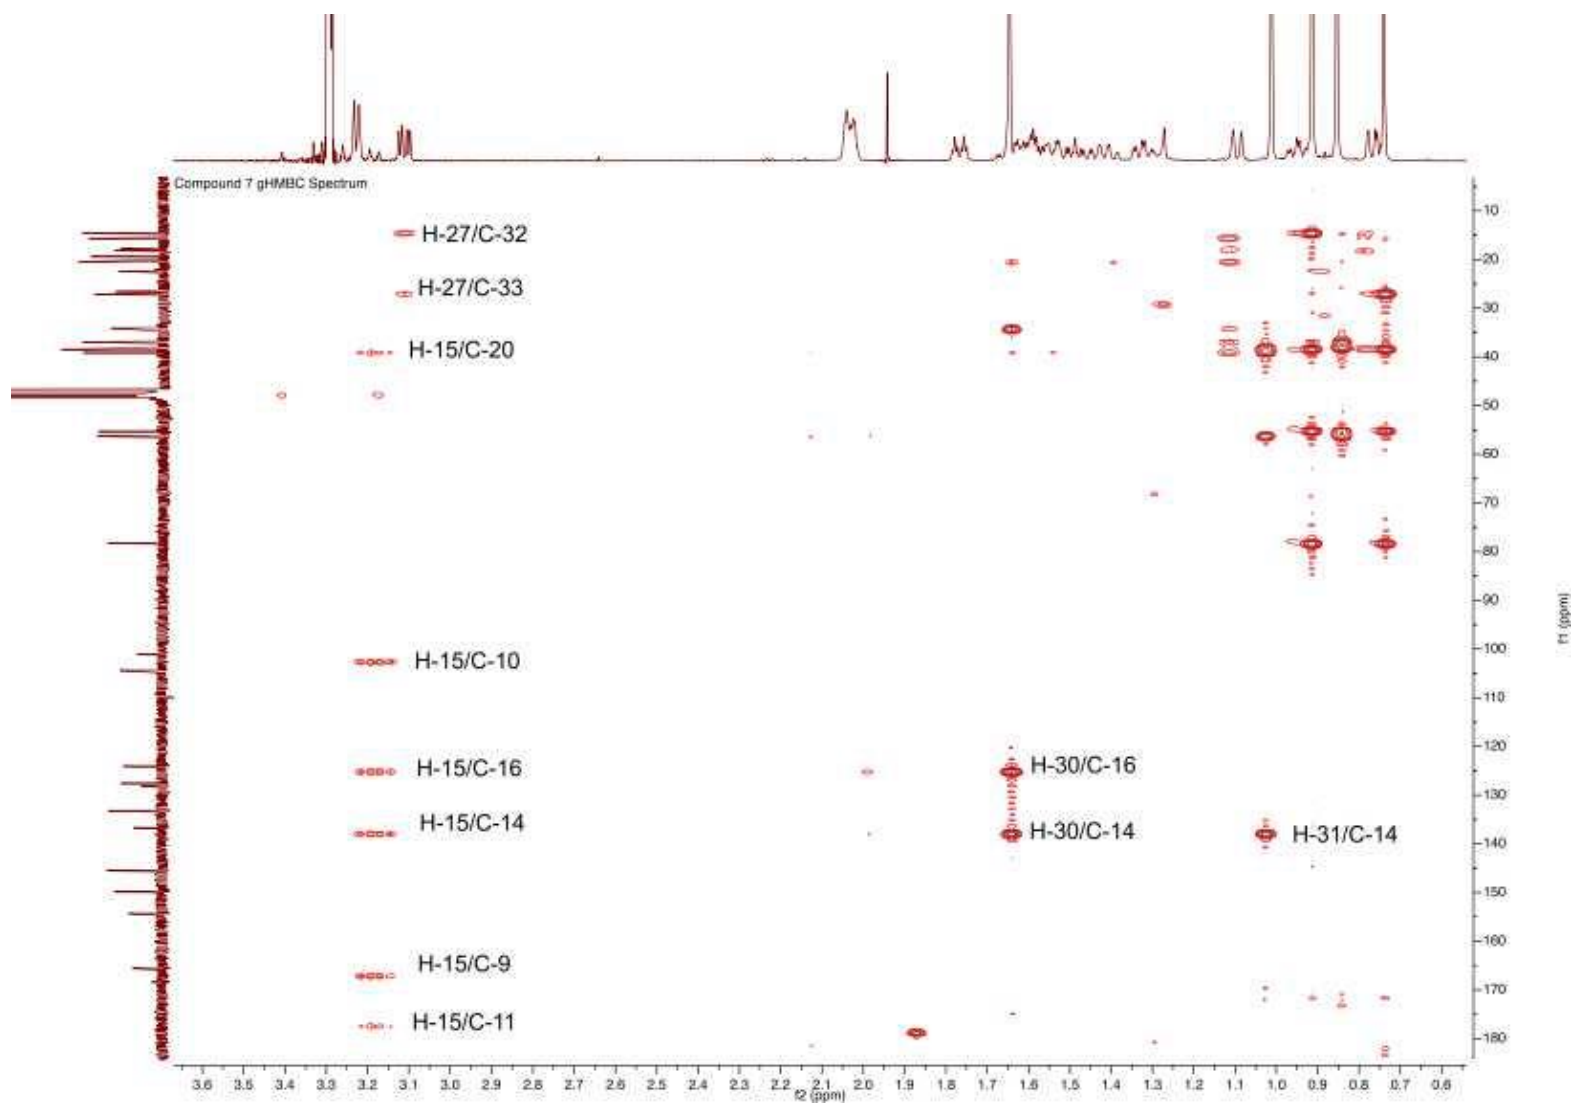

**Figure S10.**  $^1\text{H}$ - $^{13}\text{C}$  gHMBC spectrum of compound 7 in  $\text{CD}_3\text{OD}$  with labeled signals (Part 2/3)

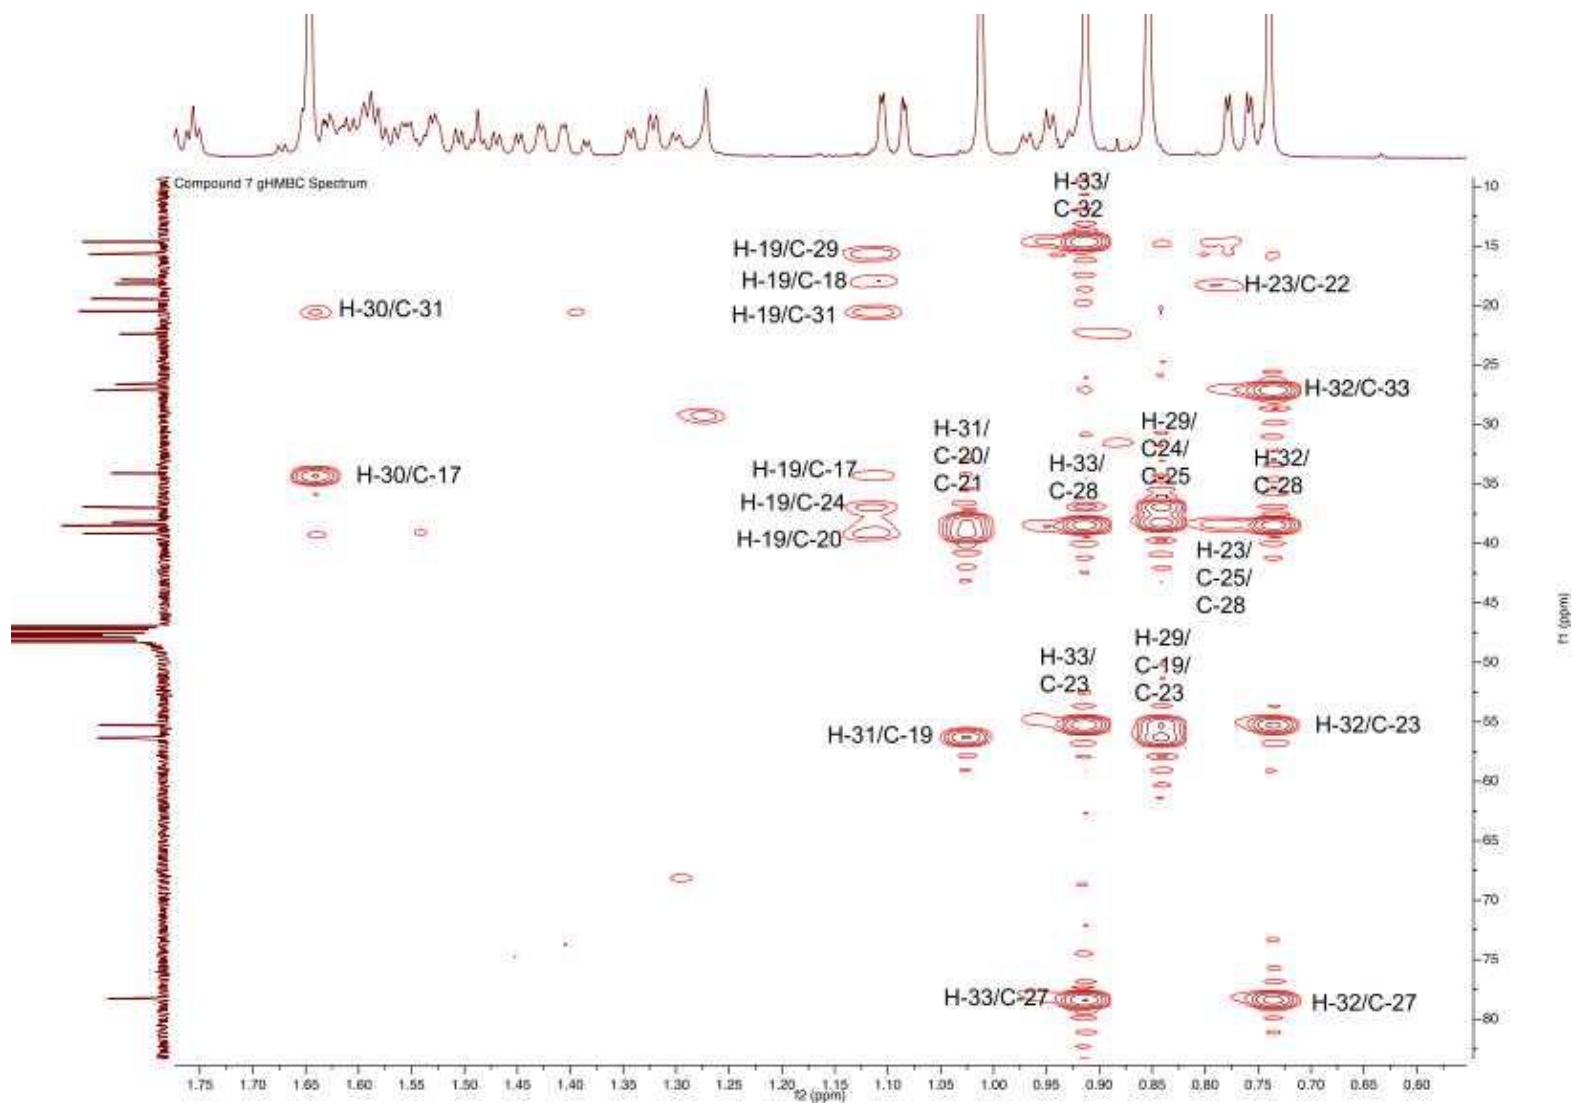

**Figure S11.** <sup>1</sup>H-<sup>13</sup>C gHMBC spectrum of compound 7 in CD<sub>3</sub>OD with labeled signals (Part 3/3)

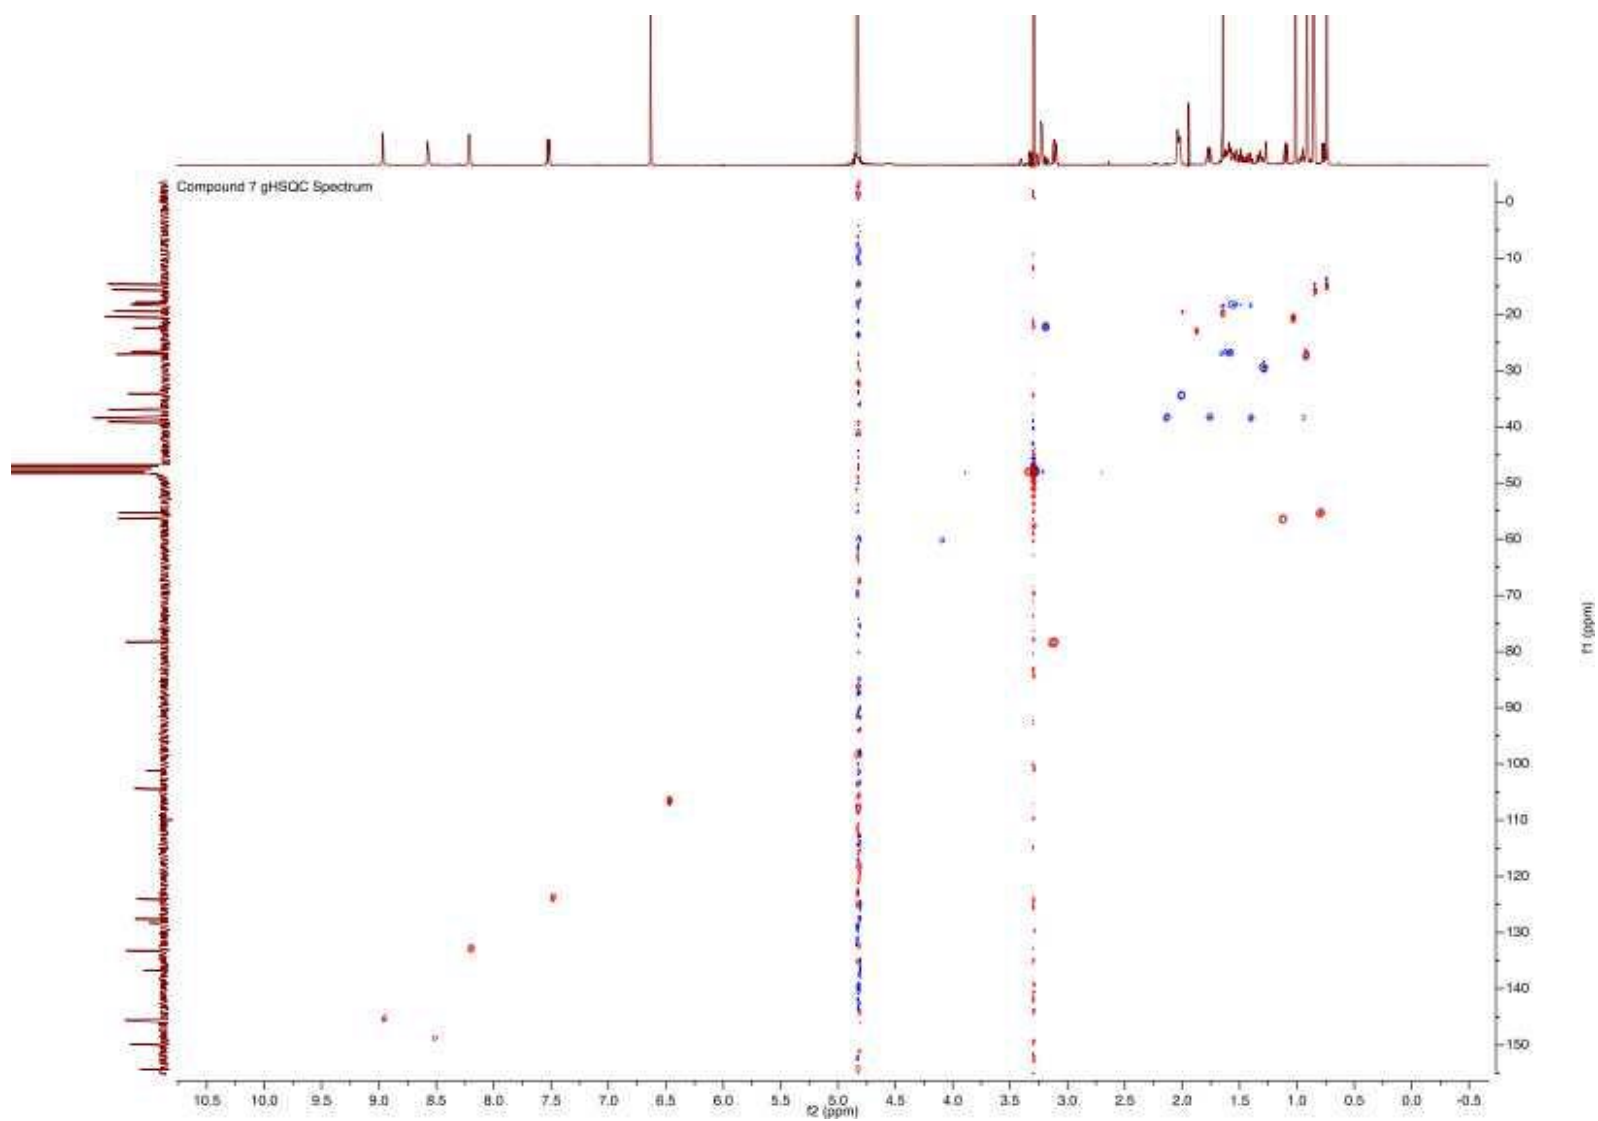

**Figure S12.**  $^1\text{H}$ - $^{13}\text{C}$  gHSQC spectrum of compound 7 in  $\text{CD}_3\text{OD}$



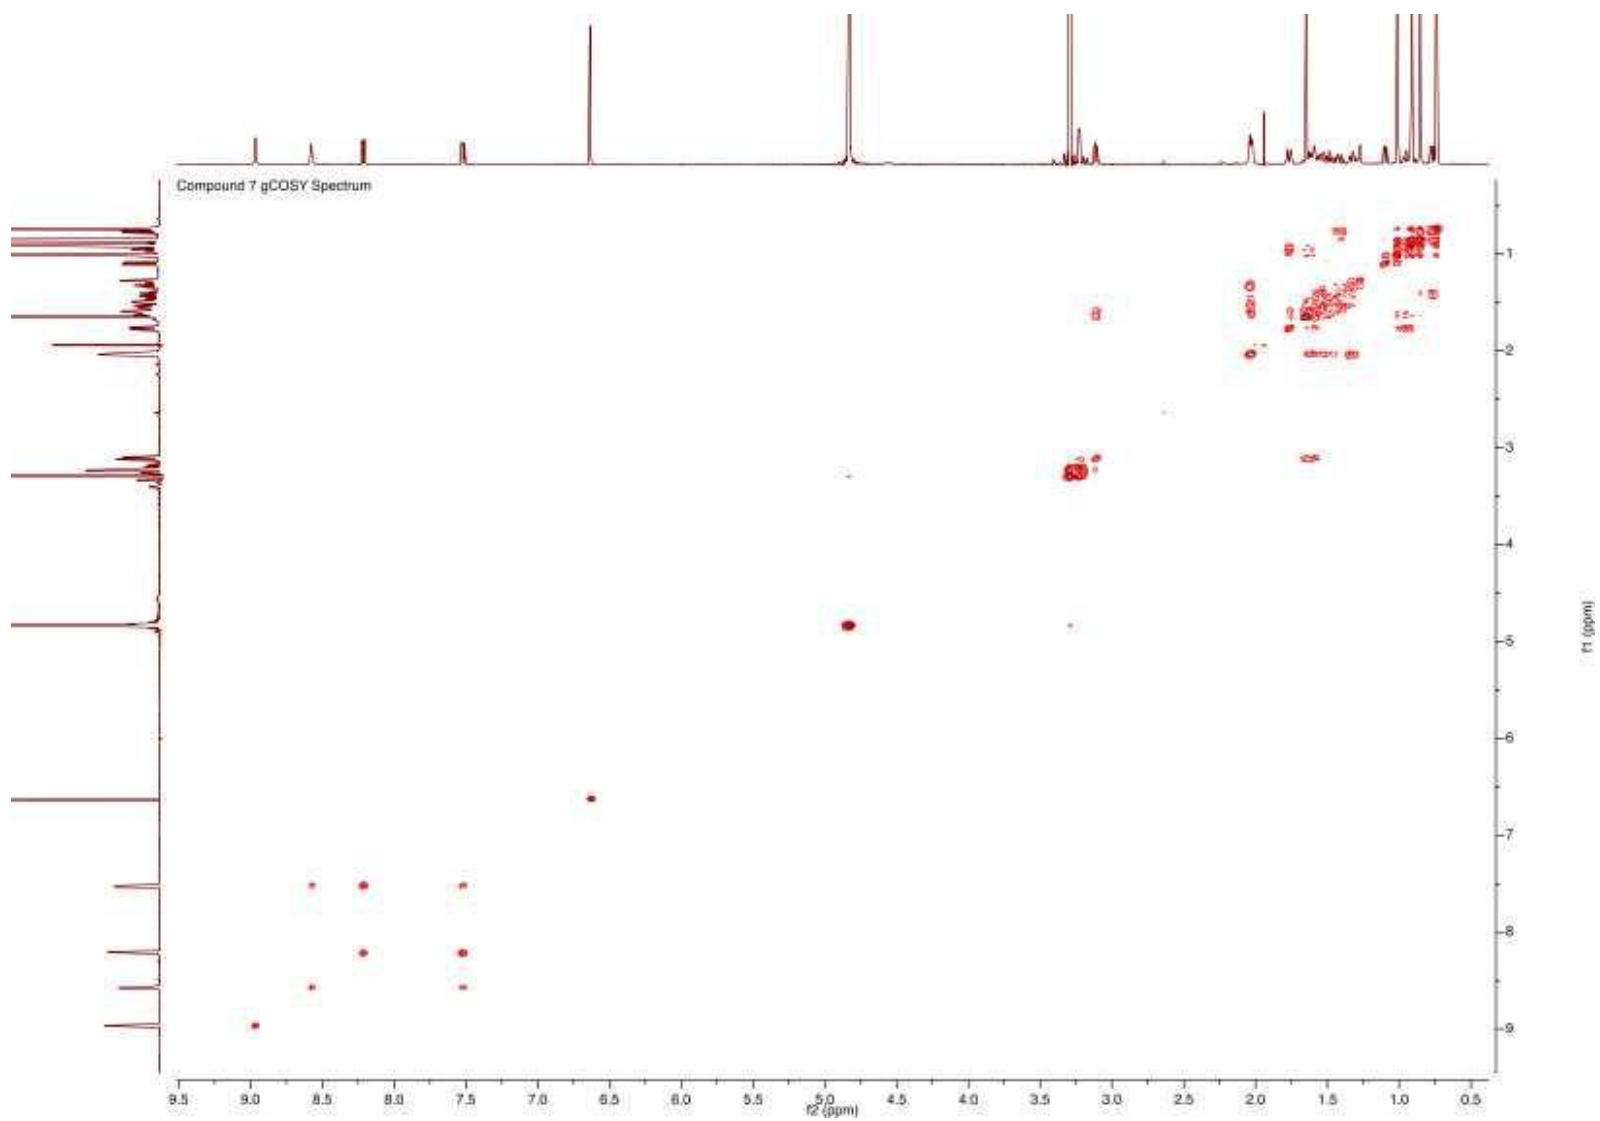

**Figure S13.** <sup>1</sup>H-<sup>1</sup>H gCOSY spectrum of compound 7 in CD<sub>3</sub>OD

Compound 8 HNMR  
Temp. 25.0 C  
Relax. delay 1.000 sec  
Pulse 45.0 degrees  
Acq. time 1.704 sec  
Width 9615.4 Hz  
512 repetitions  
Observe H1, 599.8015981 MHz

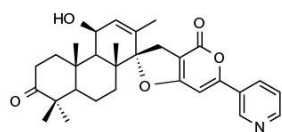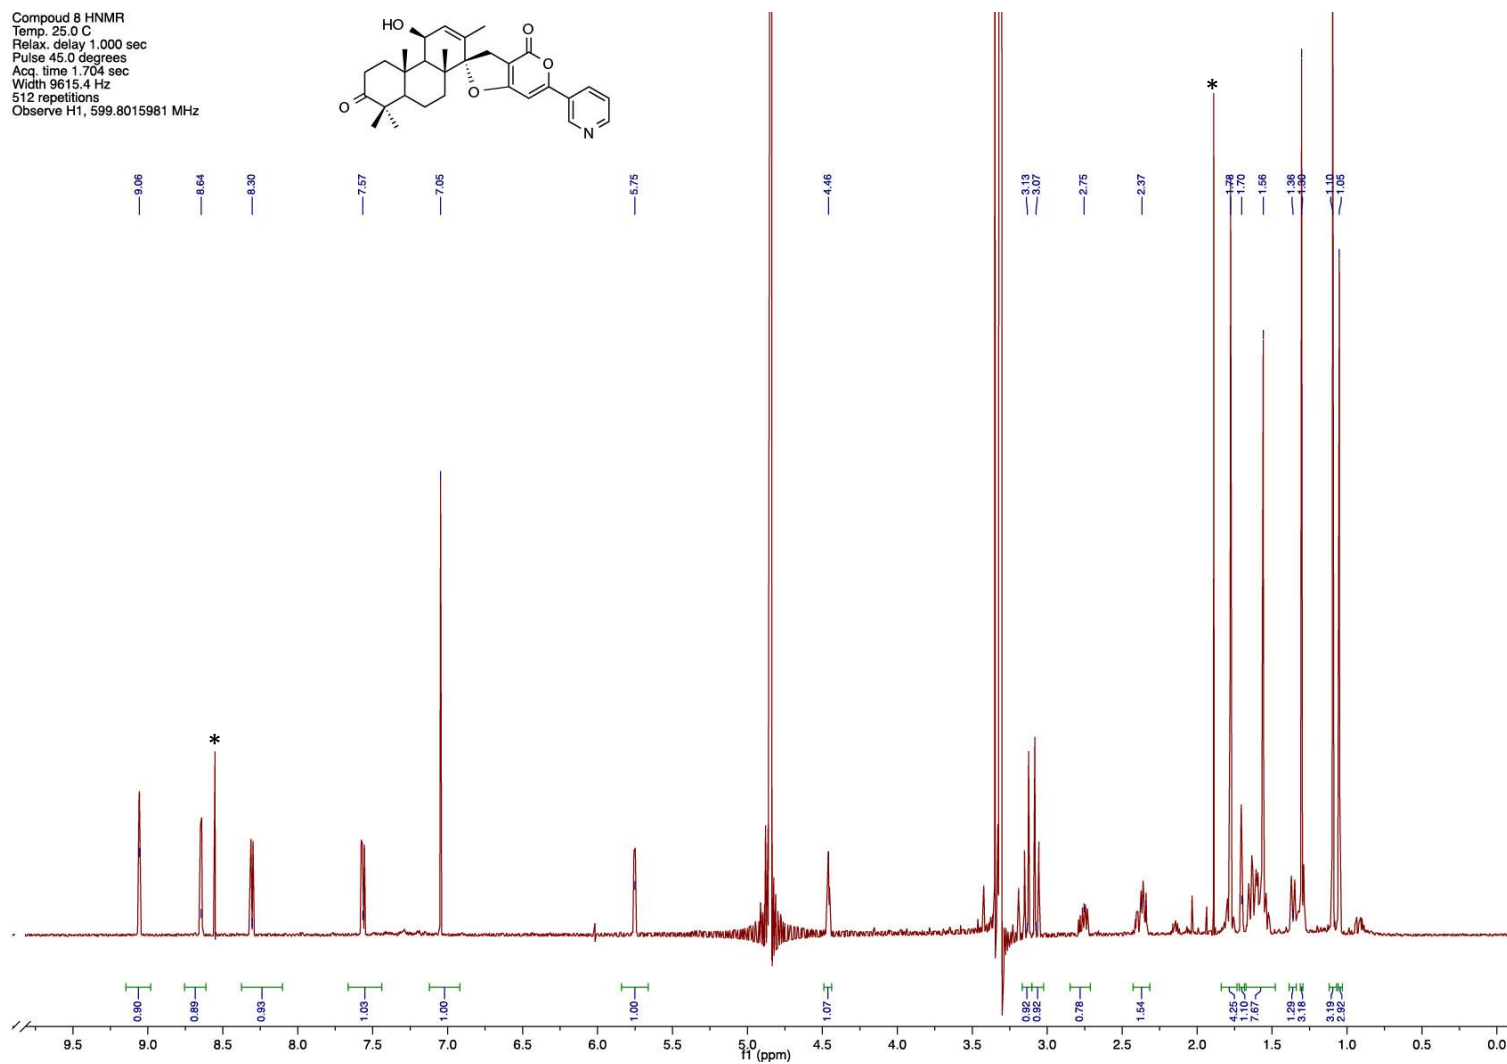

**Figure S14.**  $^1\text{H}$ -NMR spectrum of compound **8** in  $\text{CD}_3\text{OD}$ . Peaks labeled with \* were determined to be impurities based on 2D NMR spectral data which showed that they do not correlate with any other part of **8**. Both signals were also originally present in **7** and we were able to remove them by HPLC with 0.05 % of TFA in mobile phase. However, purification with TFA resulted in degradation of the compound **8**.

Compound 8 CNMR  
Temp. 25.0 C  
Relax. delay 1.000 sec  
Pulse 45.0 degrees  
Acq. time 1.304 sec  
Width 25125.6 Hz  
30000 repetitions  
Observe C13, 100.6047600 MHz  
Decouple H1, 400.1008433  
Power 36 dB continuously on  
WALTZ-16 modulated

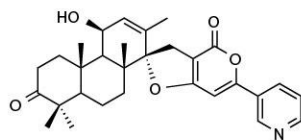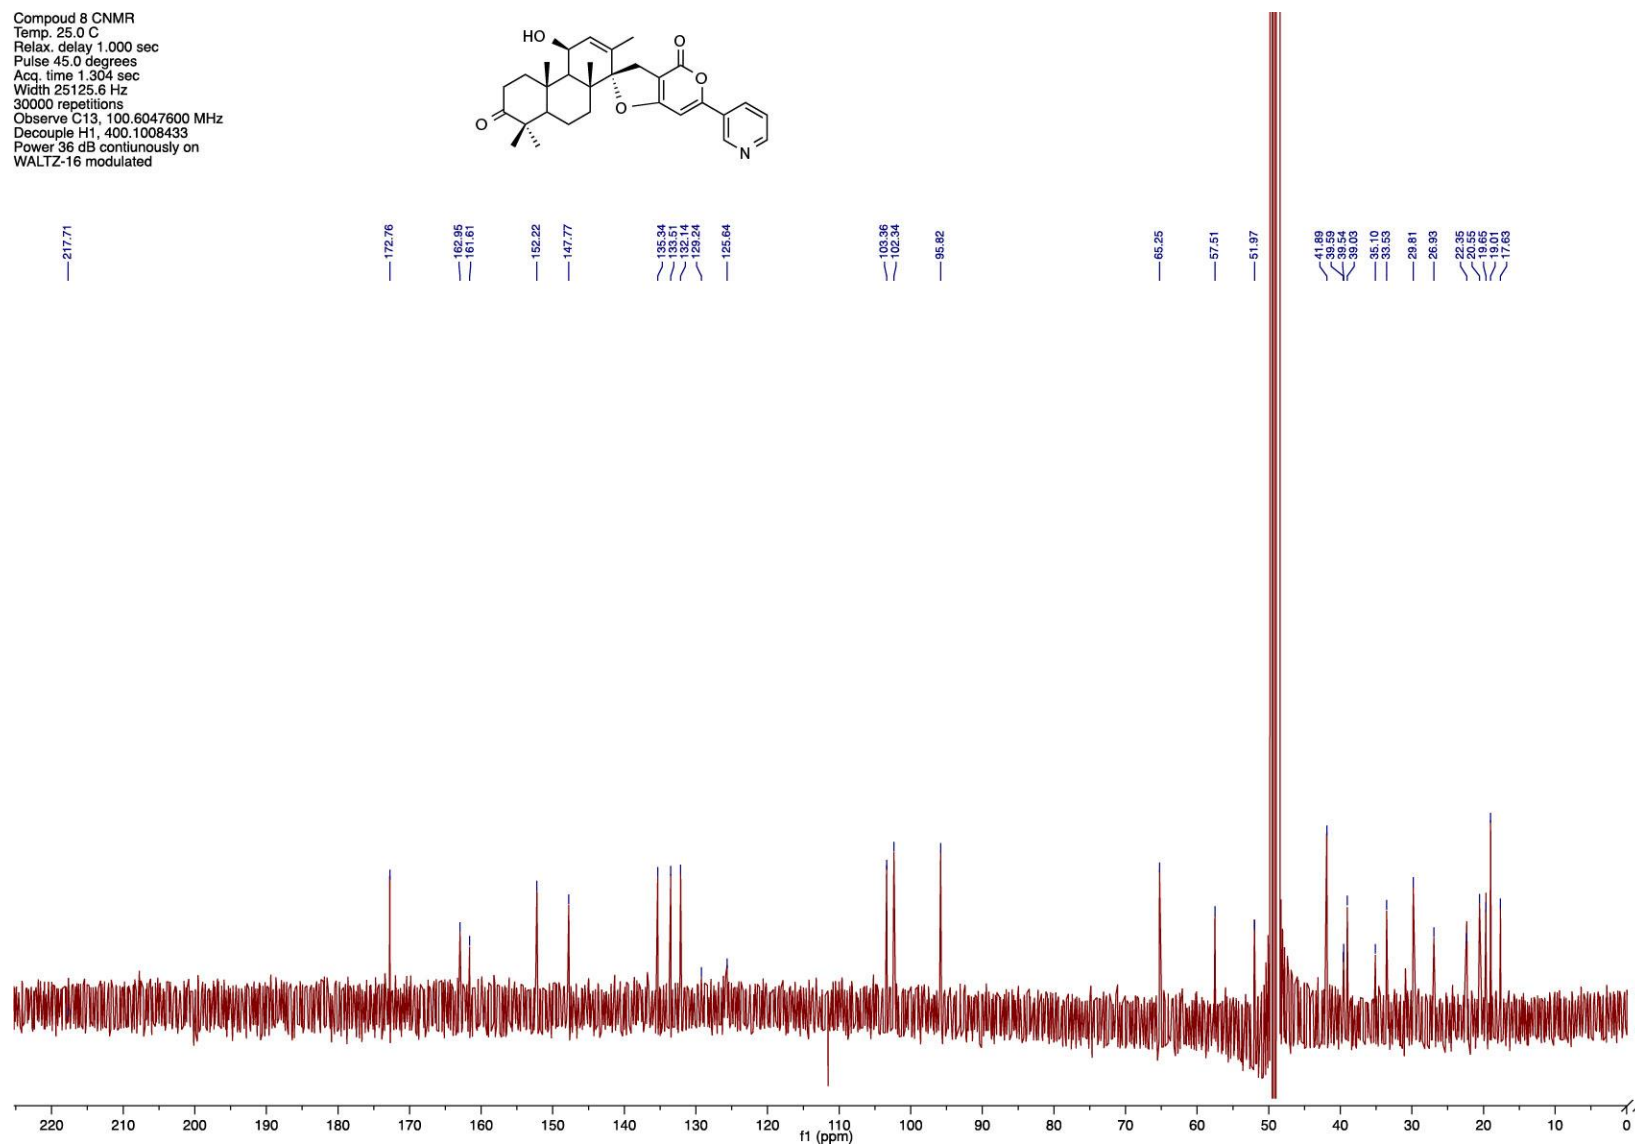

Figure S15.  $^{13}\text{C}$ -NMR spectrum of compound **8** in  $\text{CD}_3\text{OD}$

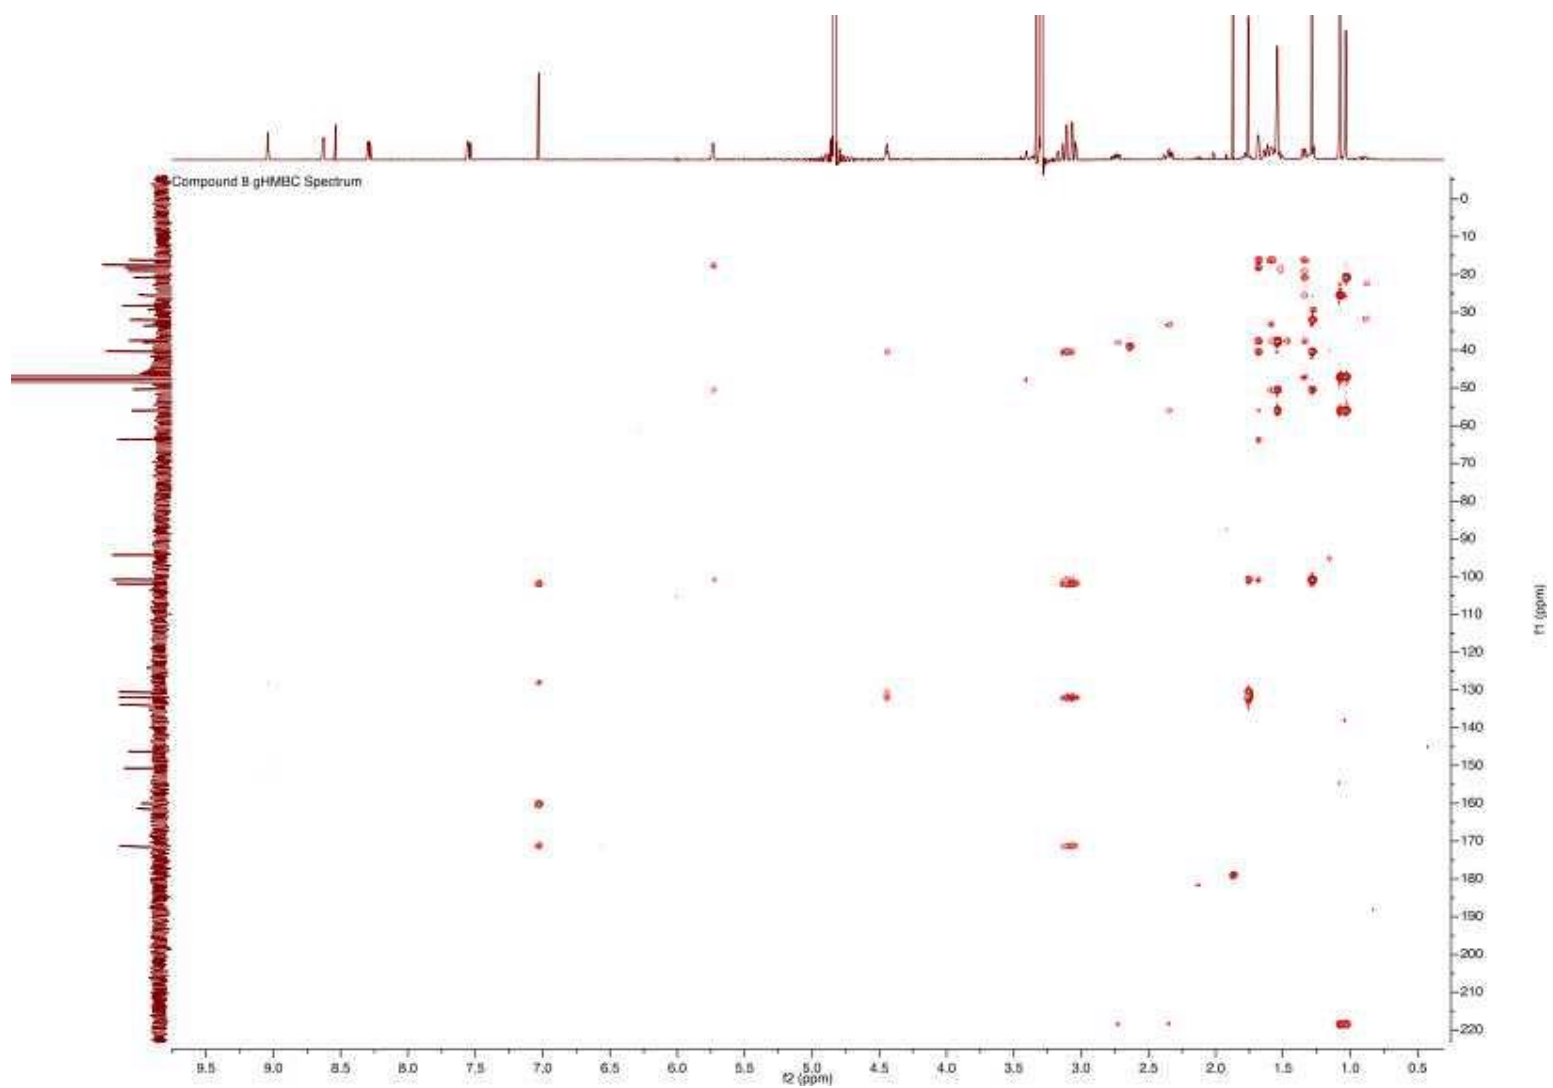

**Figure S16.**  $^1\text{H}$ - $^{13}\text{C}$  gHMBC spectrum of compound 8 in  $\text{CD}_3\text{OD}$

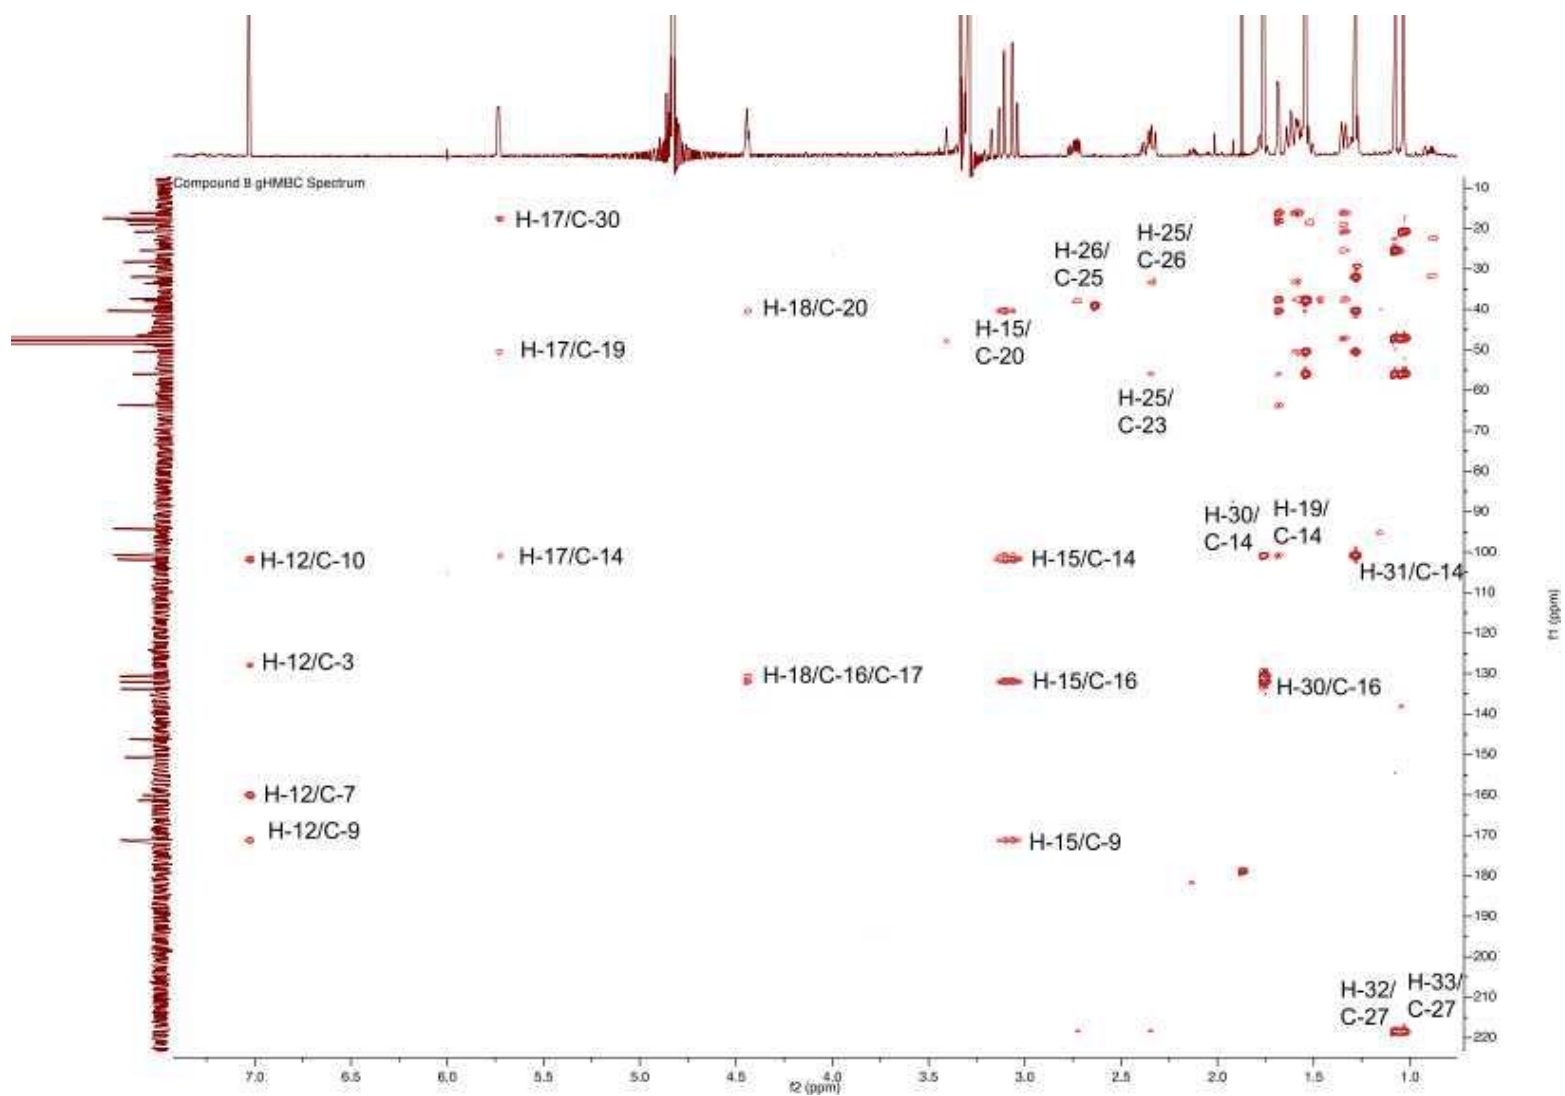

Figure S17.  $^1\text{H}$ - $^{13}\text{C}$  gHMBC spectrum of compound 8 in  $\text{CD}_3\text{OD}$  with labeled signals (Part 1/2)

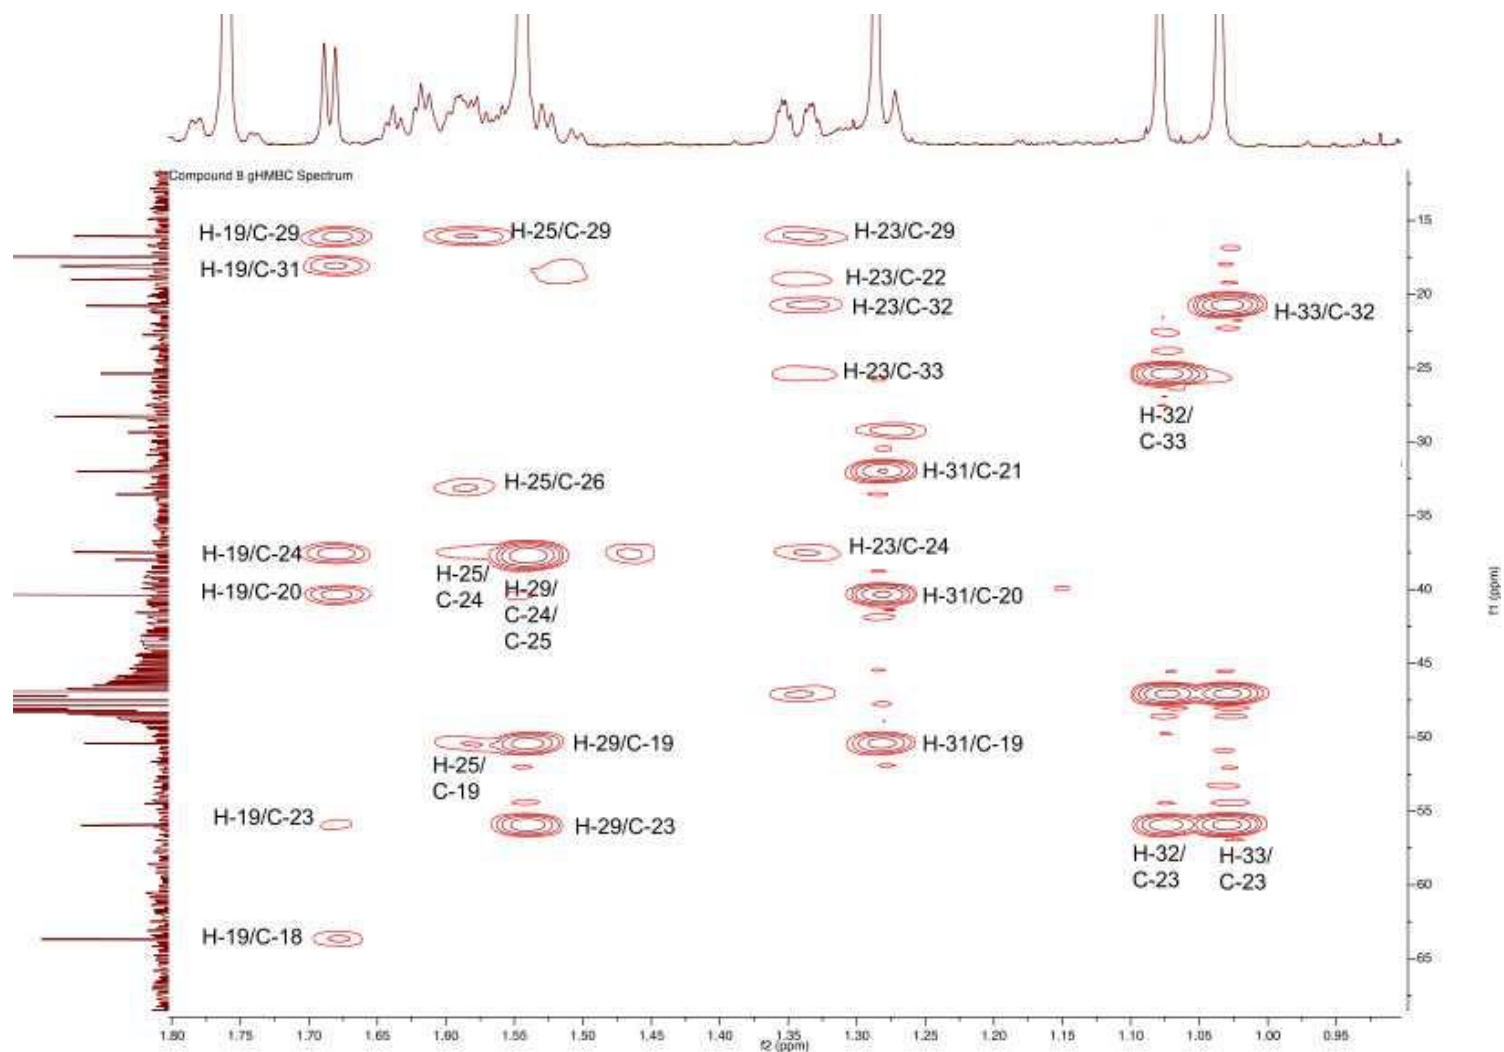

Figure S18.  $^1\text{H}$ - $^{13}\text{C}$  gHMBC spectrum of compound 8 in  $\text{CD}_3\text{OD}$  with labeled signals (Part 2/2)

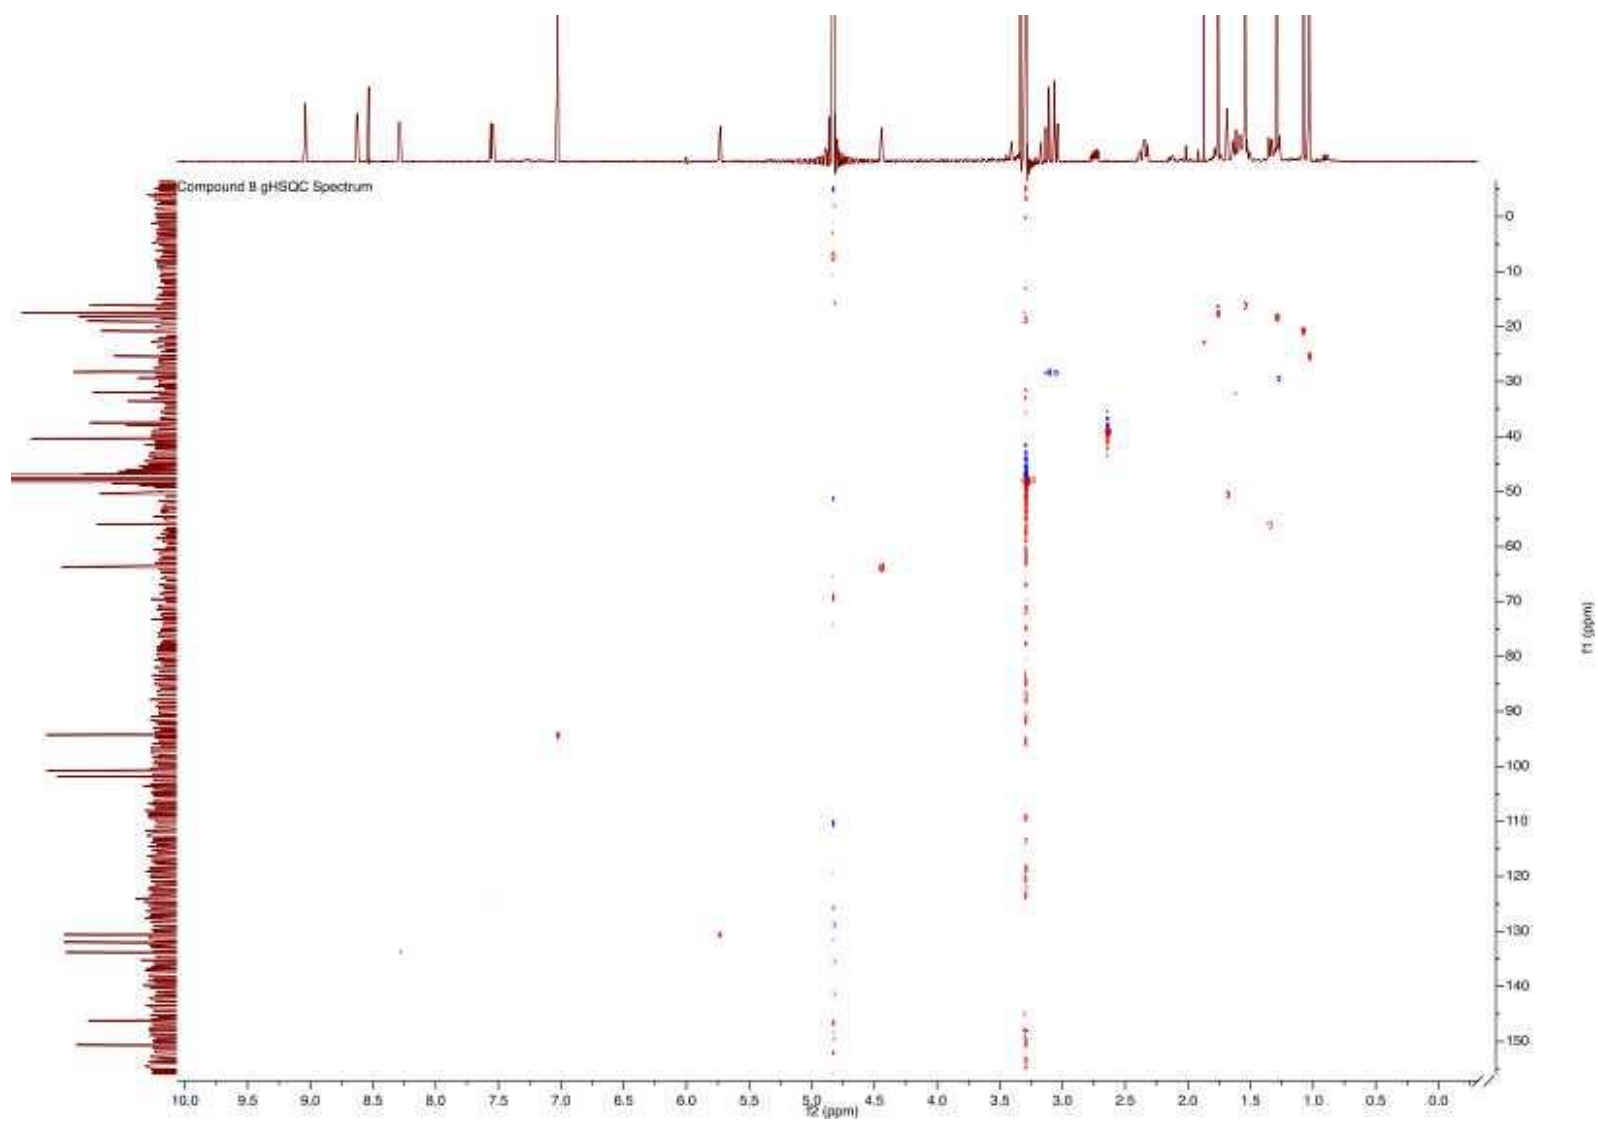

**Figure S19.** <sup>1</sup>H-<sup>13</sup>C gHSQC spectrum of compound 8 in CD<sub>3</sub>OD

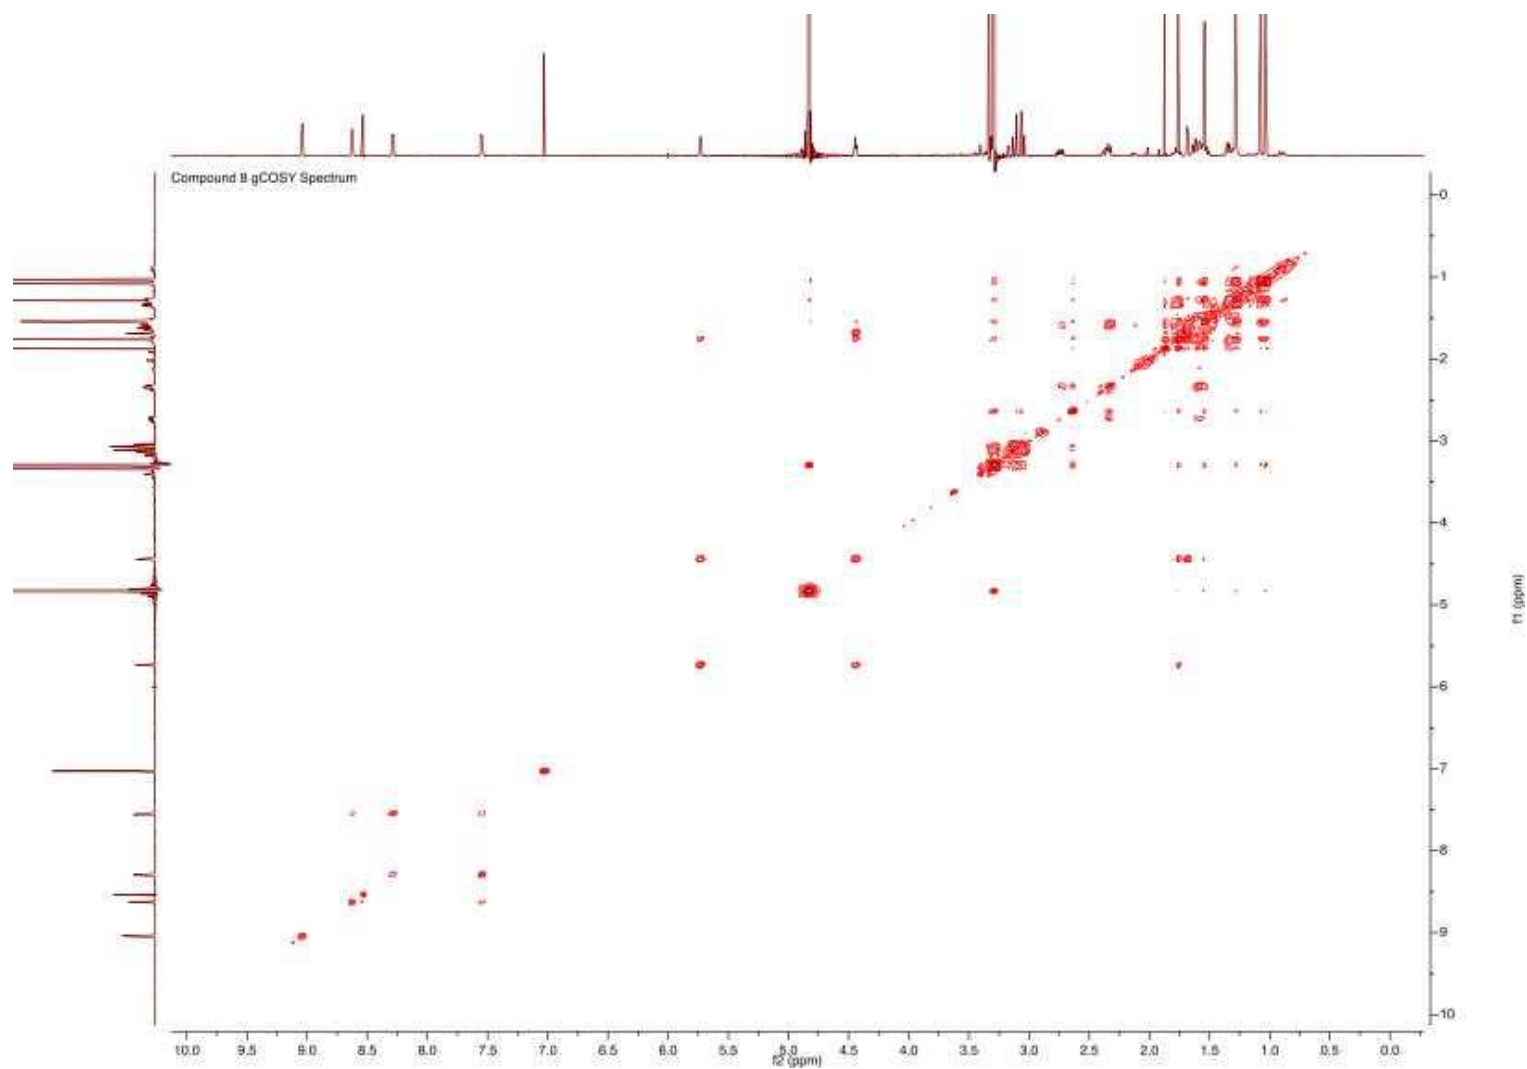

**Figure S20.**  $^1\text{H}$ - $^1\text{H}$  gCOSY spectrum of compound 8 in  $\text{CD}_3\text{OD}$
